# Supplementary material for: Synthesis of 2,3-dihydro-1H-indazoles by Rh(iii)-catalyzed C–H cleavage of arylhydrazines
Source: Royal Society of Chemistry journal article supplement (doi:10.1039/c4ob00921e), 2014-01-01

# Synthesis of 2,3-Dihydro-1*H*-Indazoles by Rh(III)-Catalyzed C-H Cleavage of Arylhydrazines

Jinzhong Yao,<sup>a</sup> Ruokun Feng,<sup>a</sup> Cong Lin,<sup>a</sup> Zhanxiang Liu,\*<sup>a</sup> Yuhong Zhang\*<sup>a,b</sup>  
<sup>a</sup> Department of Chemistry, Zhejiang University, Hangzhou 310027, P.R. China  
<sup>b</sup> State Key Laboratory of Applied Organic Chemistry, Lanzhou University, Lanzhou  
730000, P.R. China

Fax: +86-571-87953244; Tel: +86-571-87952723;

E-mail: [liuzhanx@zju.edu.cn](mailto:liuzhanx@zju.edu.cn), [yhzhang@zju.edu.cn](mailto:yhzhang@zju.edu.cn)

## Supporting Information

### Content

<sup>1</sup>H NMR and <sup>13</sup>C NMR spectra of the starting materials.....S 2

<sup>1</sup>H NMR and <sup>13</sup>C NMR spectra of the products.....S 14

# 1. $^1\text{H}$ NMR and $^{13}\text{C}$ NMR spectra of the starting materials

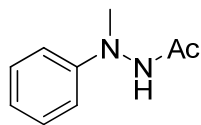

1a

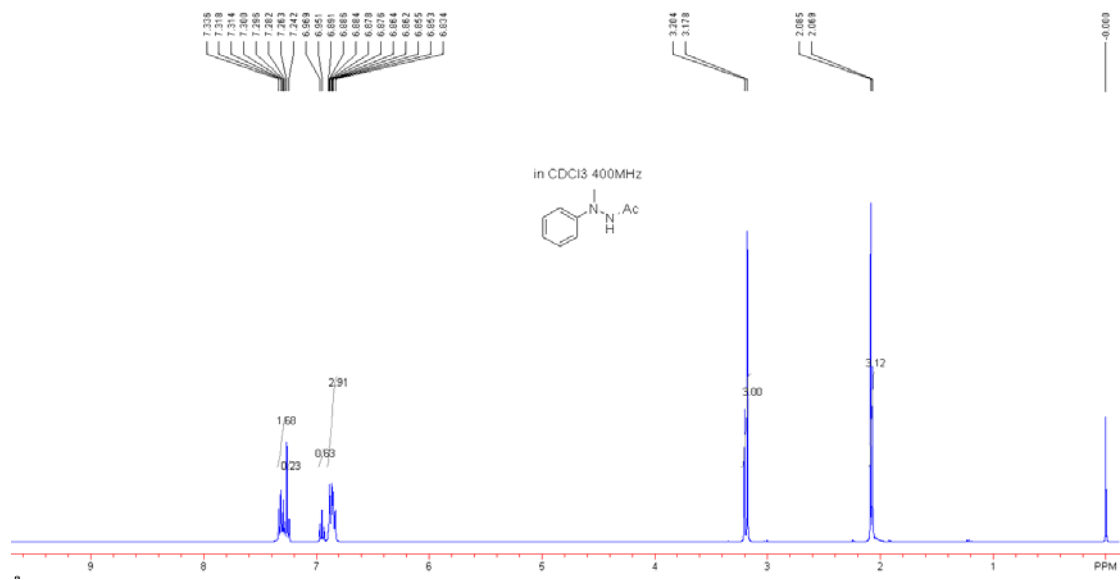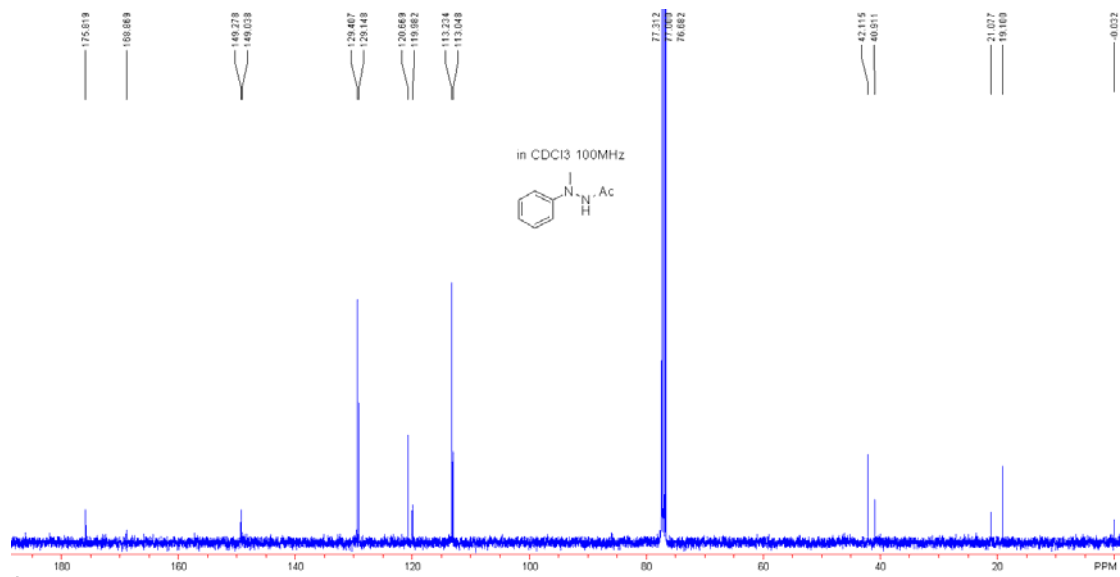

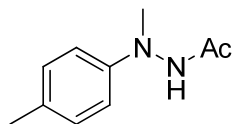

**1b**

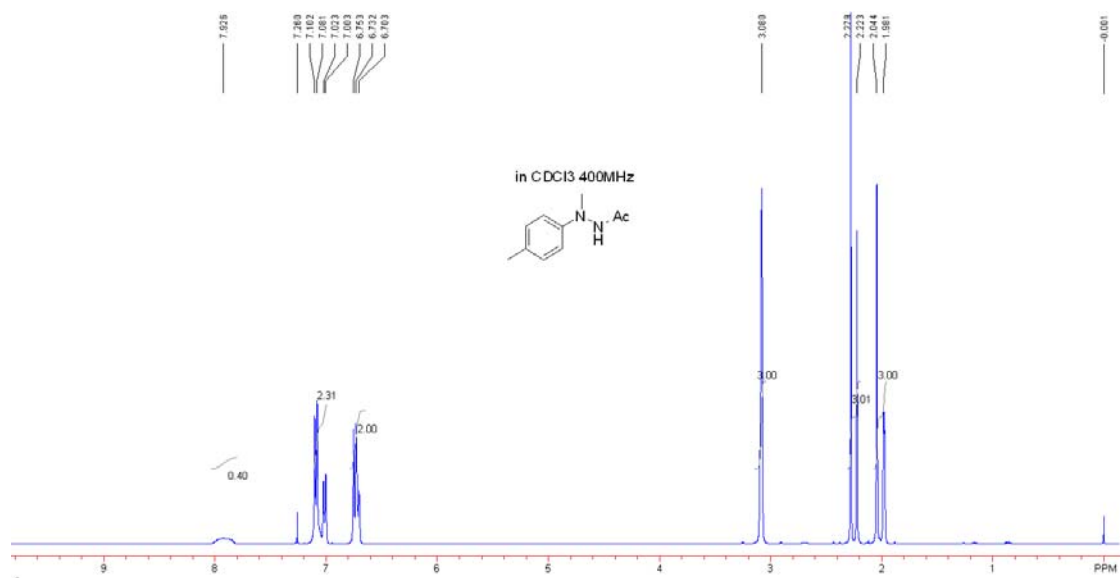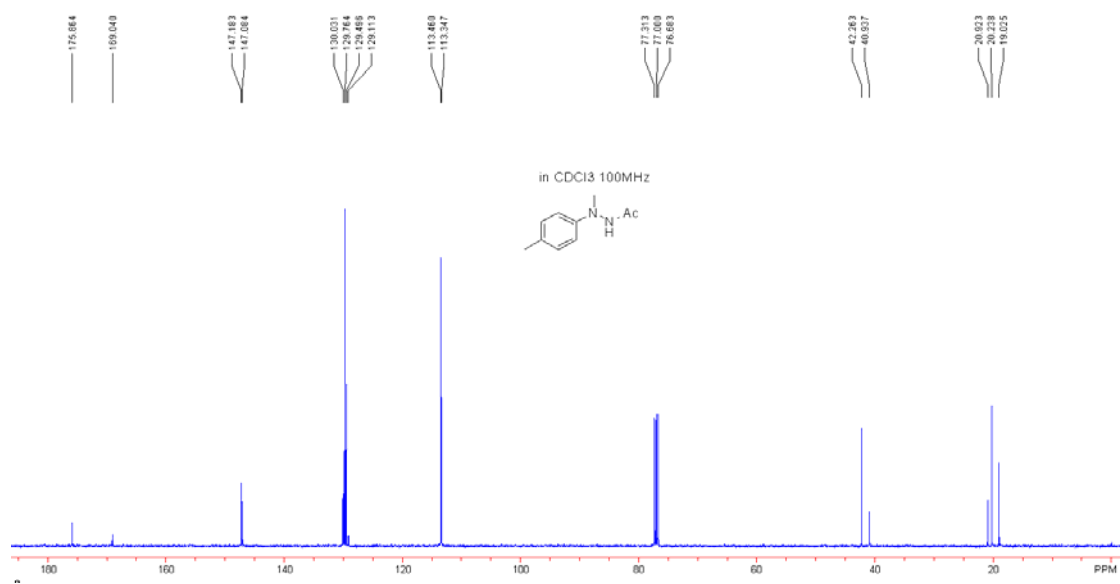

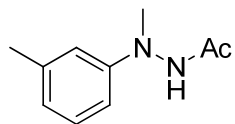

**1c**

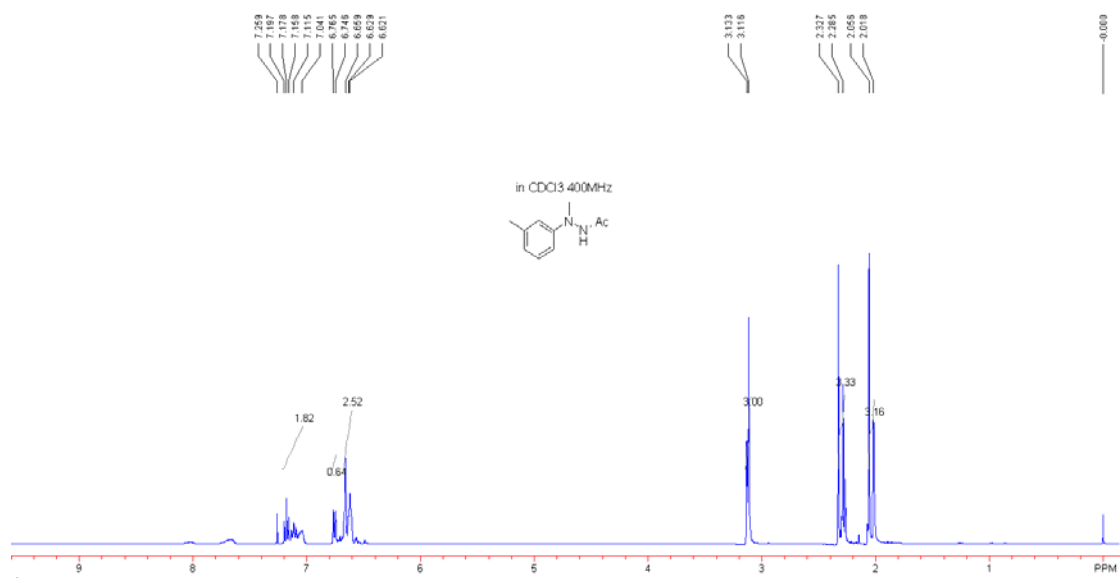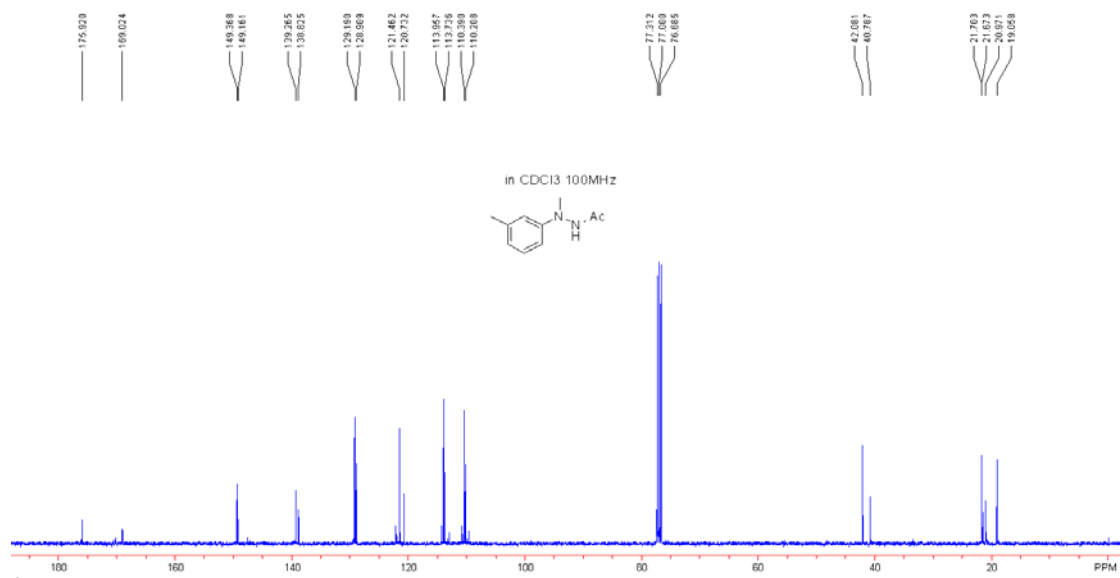

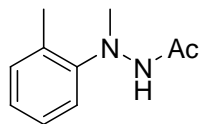

**1d**

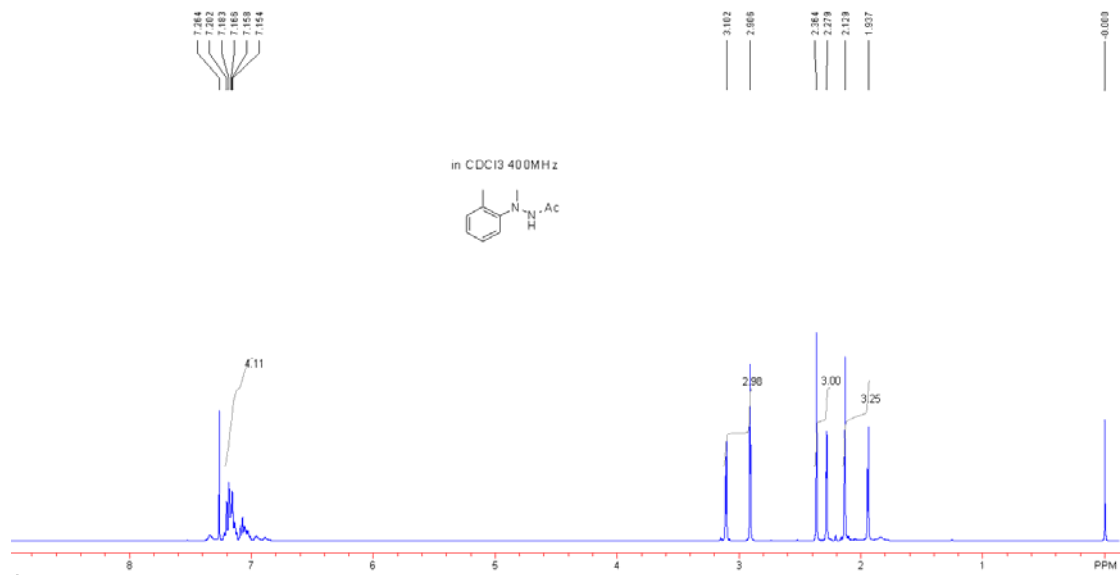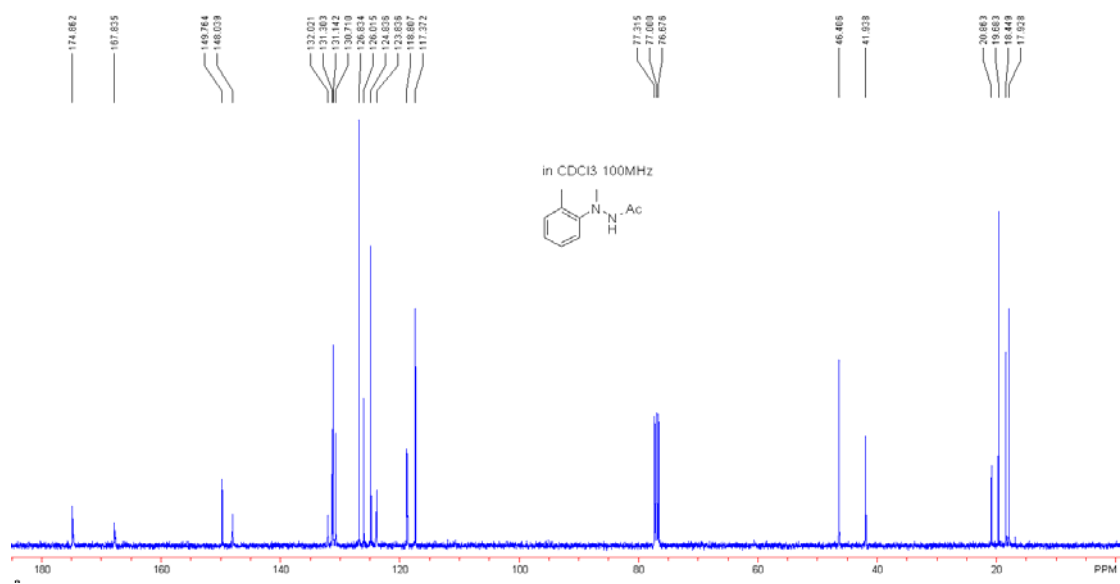

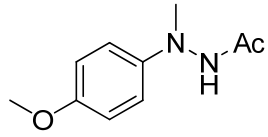

**1e**

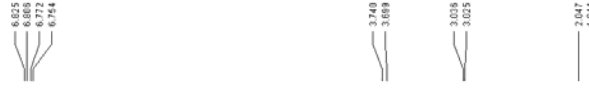

in CDCl<sub>3</sub> 400MHz

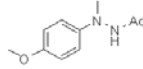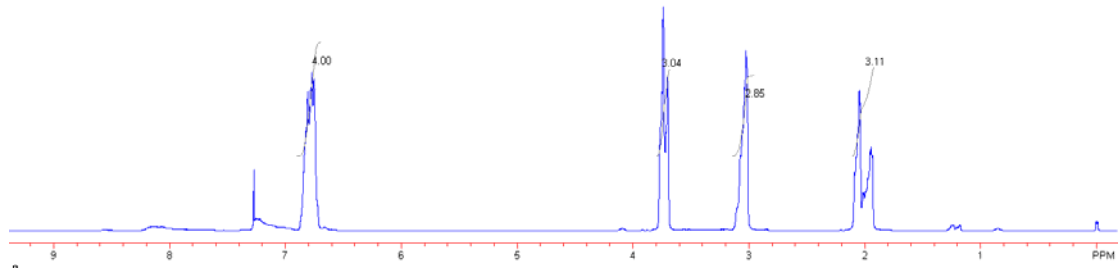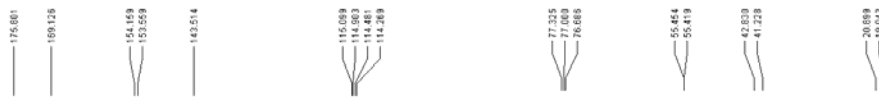

in CDCl<sub>3</sub> 100MHz

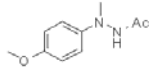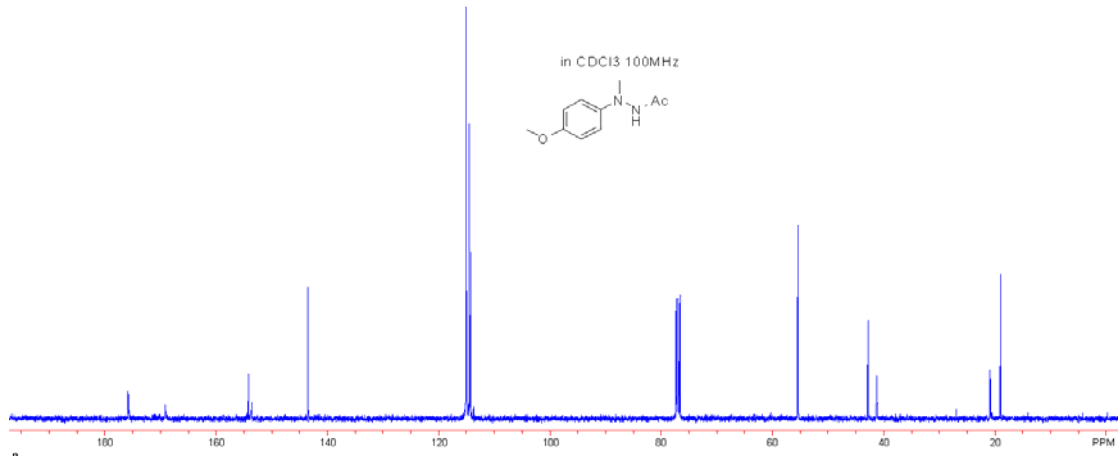

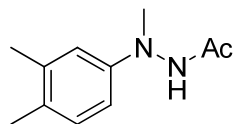

**1f**

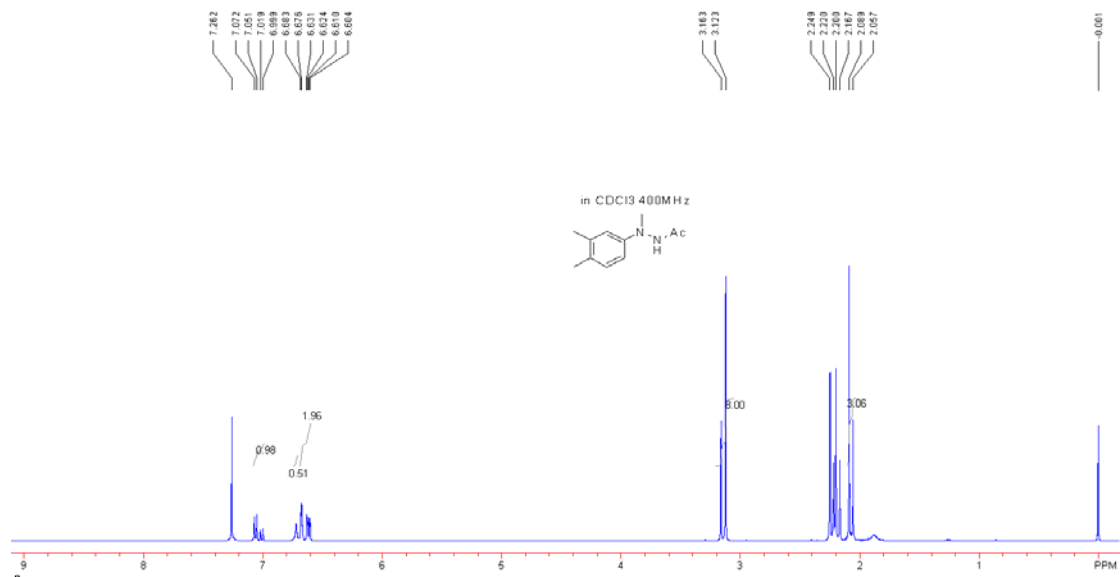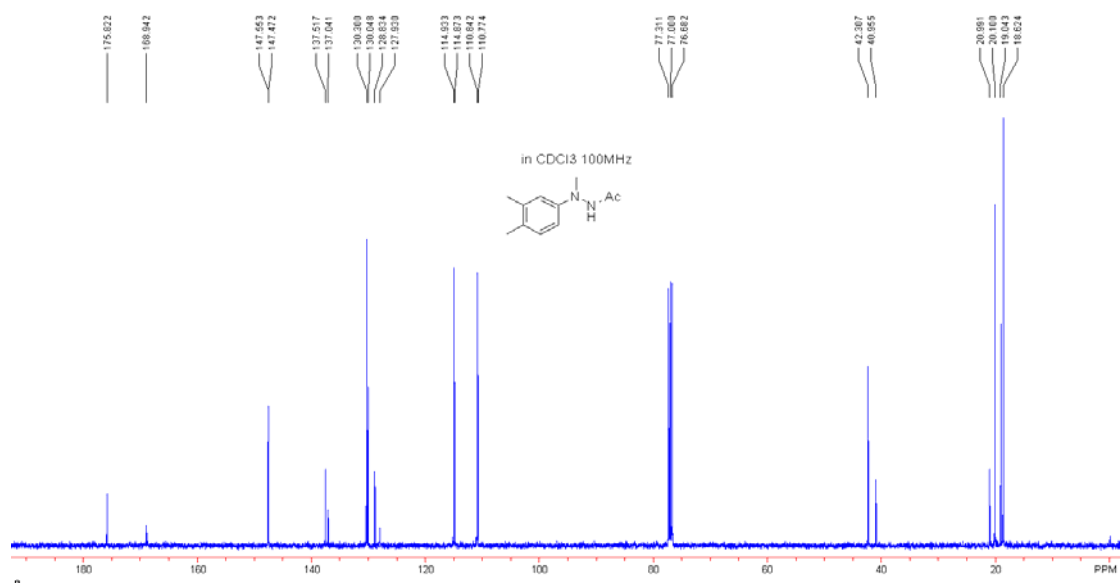

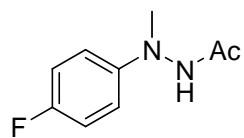

**1g**

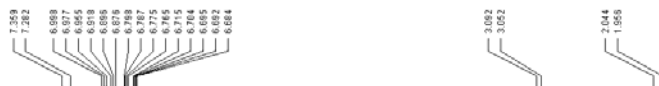

in CDCl<sub>3</sub> 400MHz

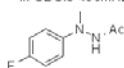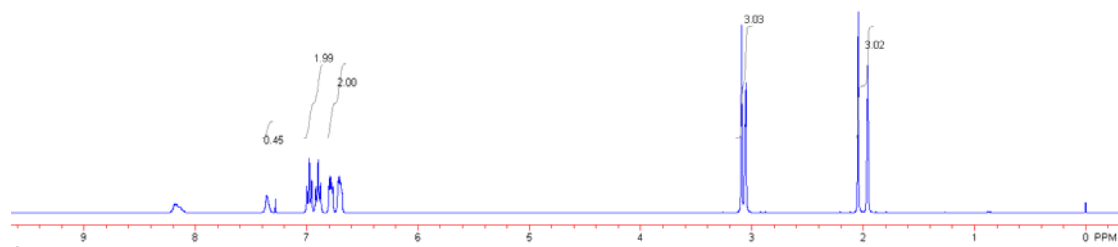

in CDCl<sub>3</sub> 400MHz

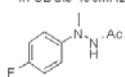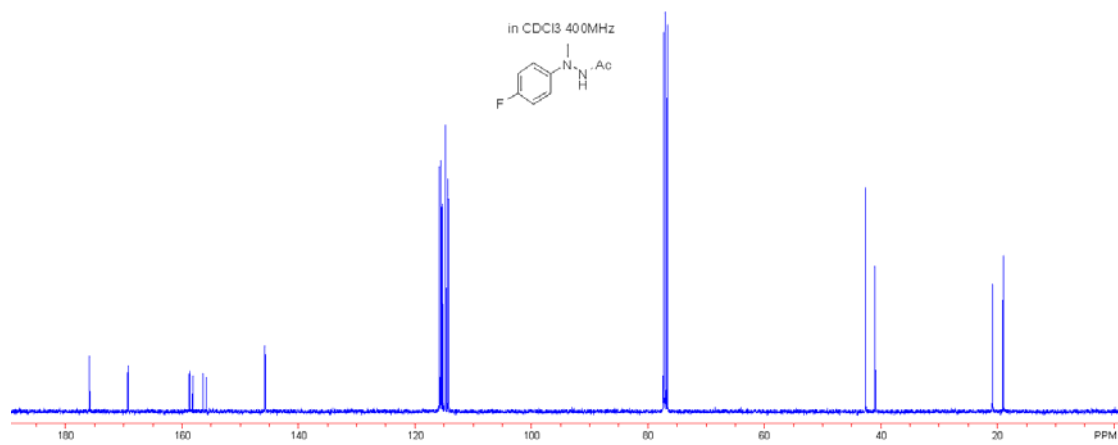



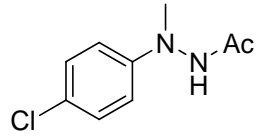

**1h**

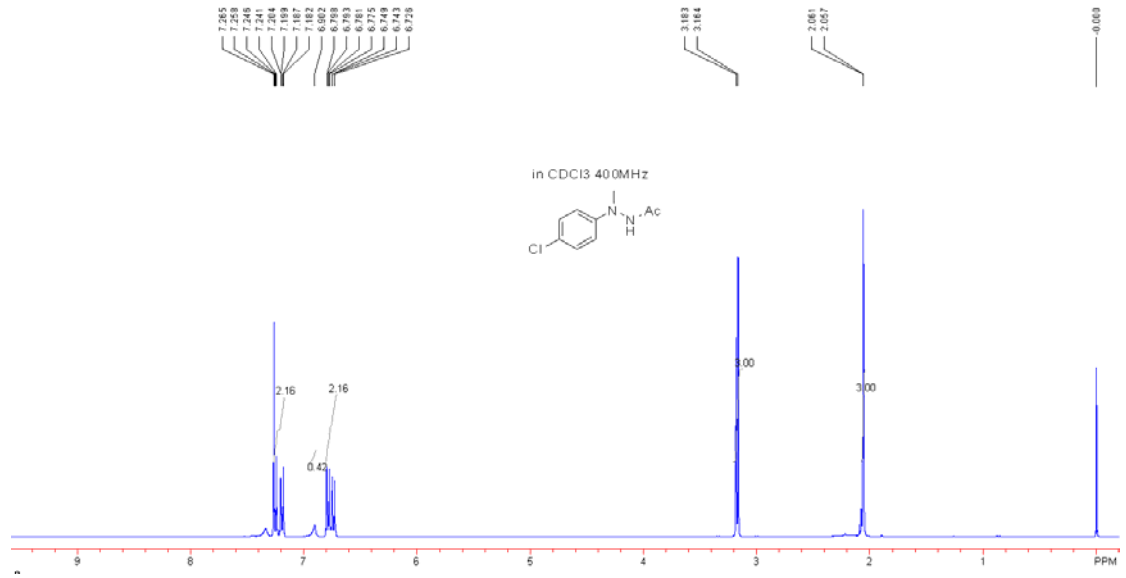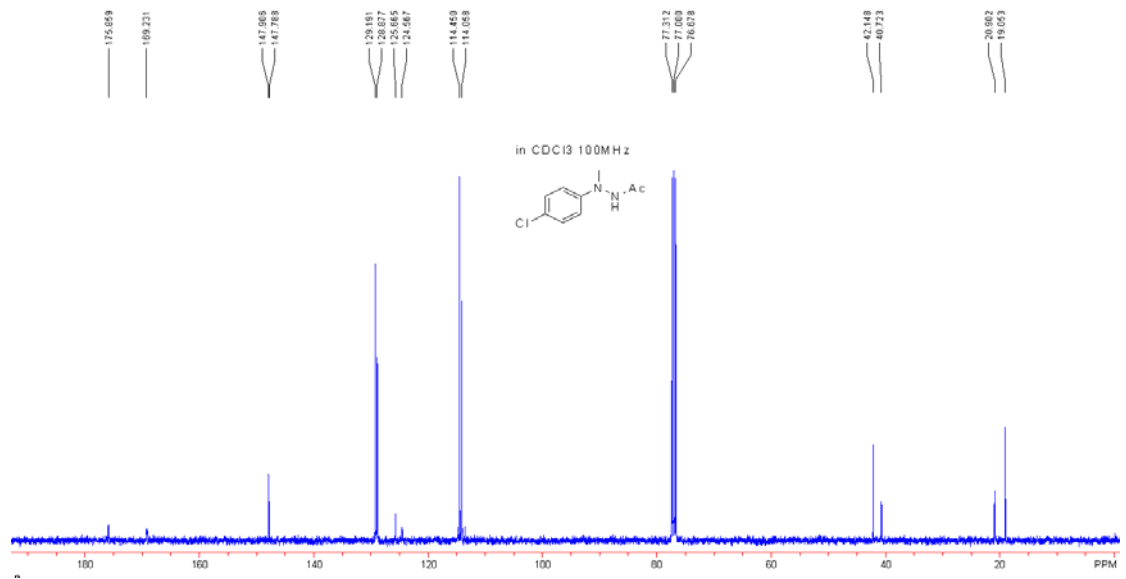

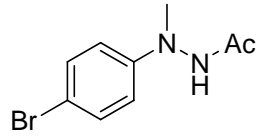

**1i**

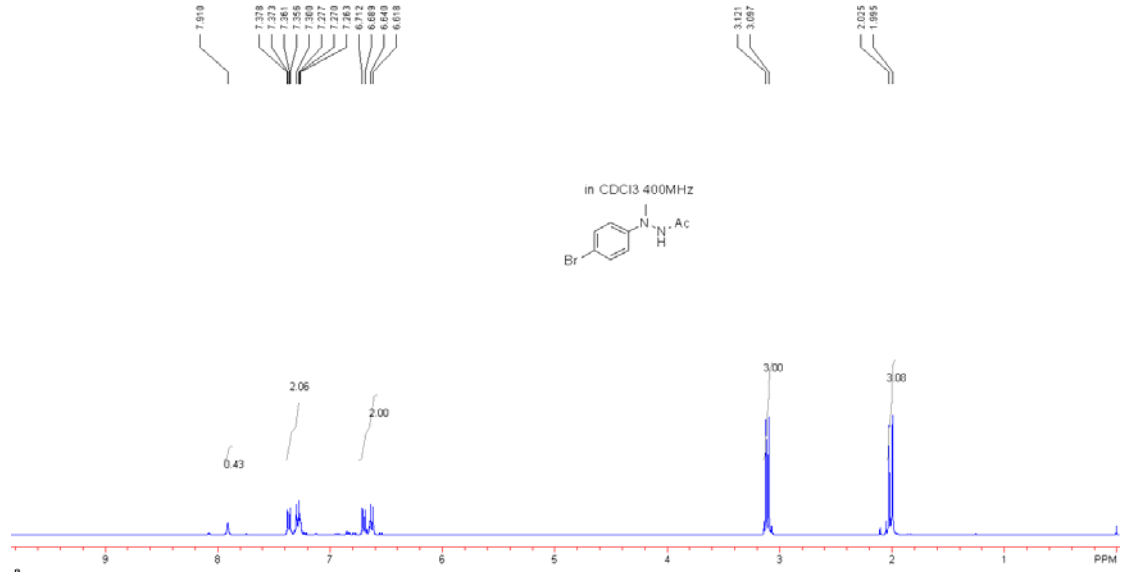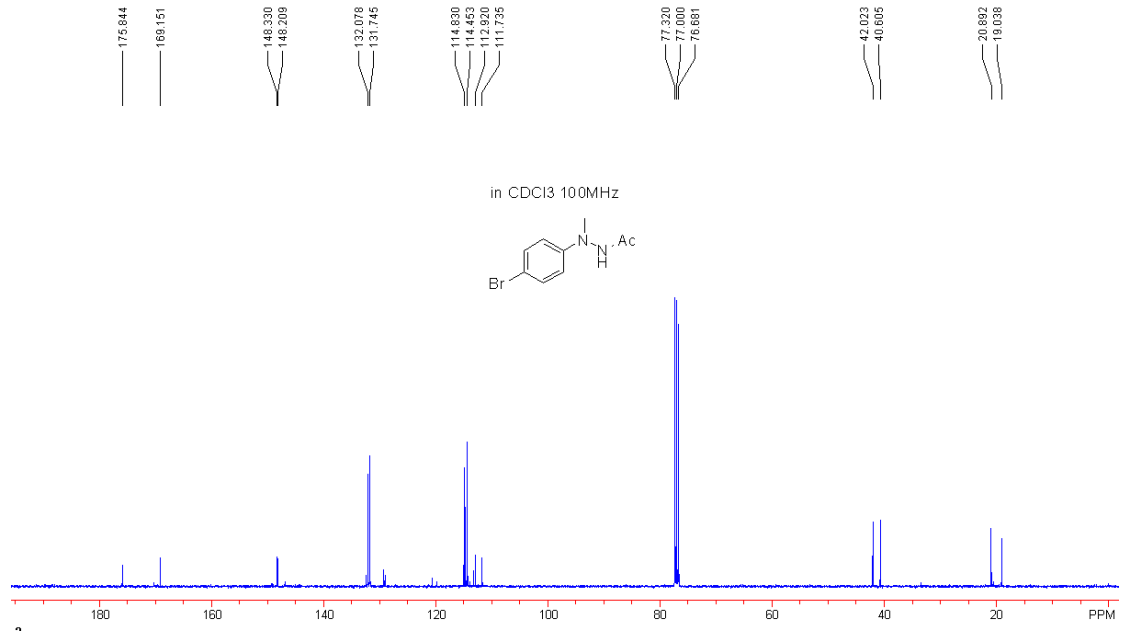

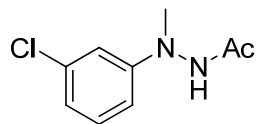

1j

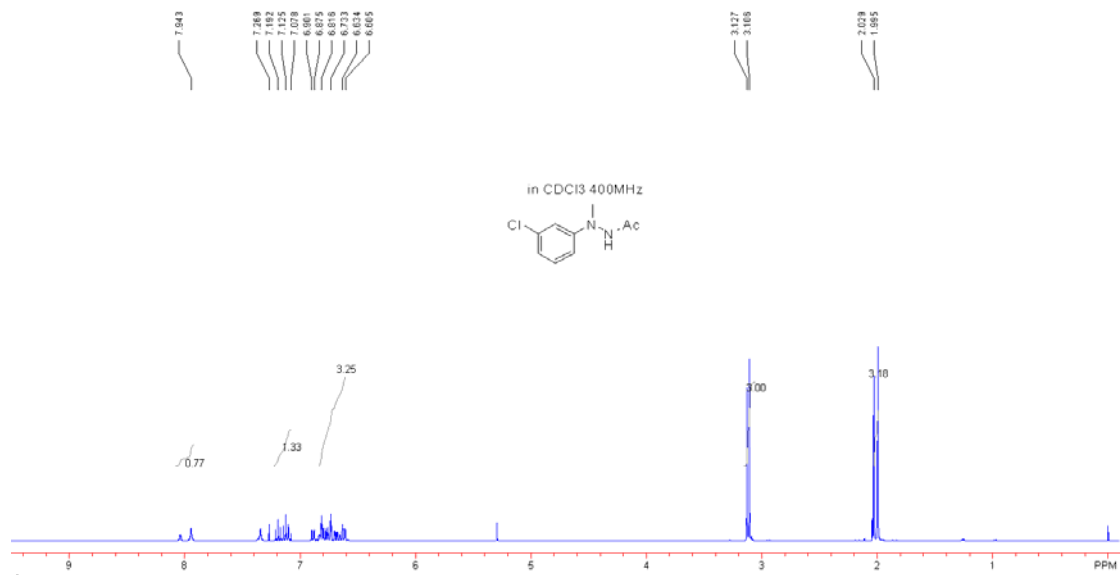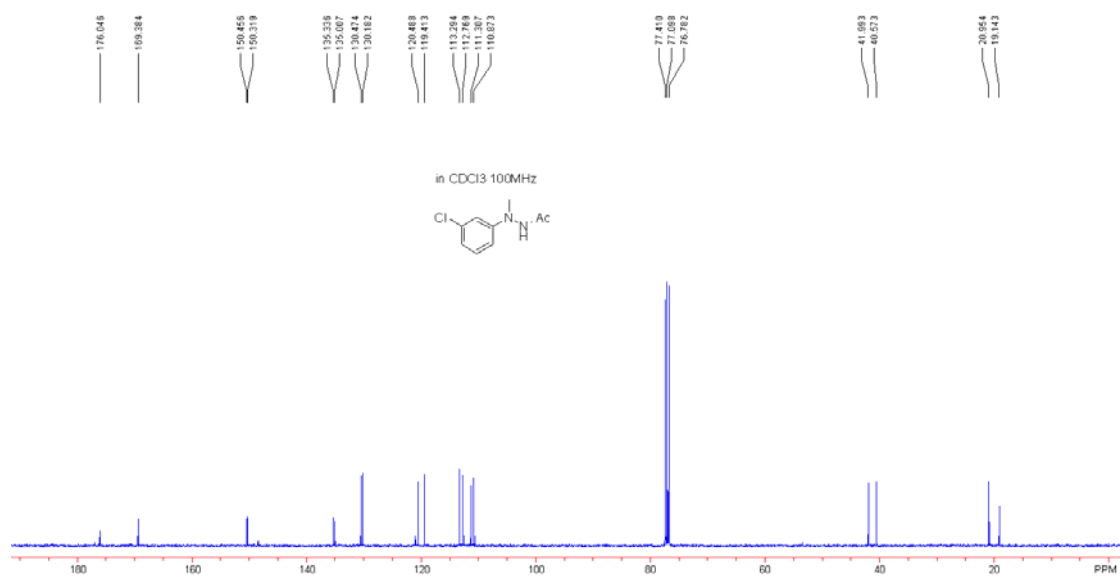

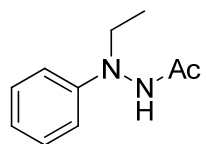

**1k**

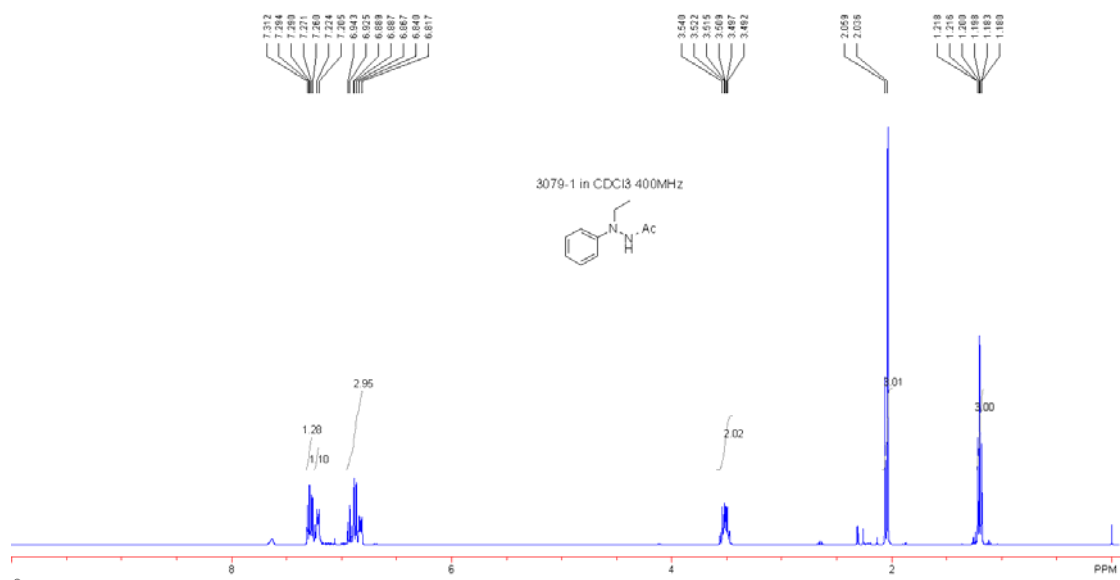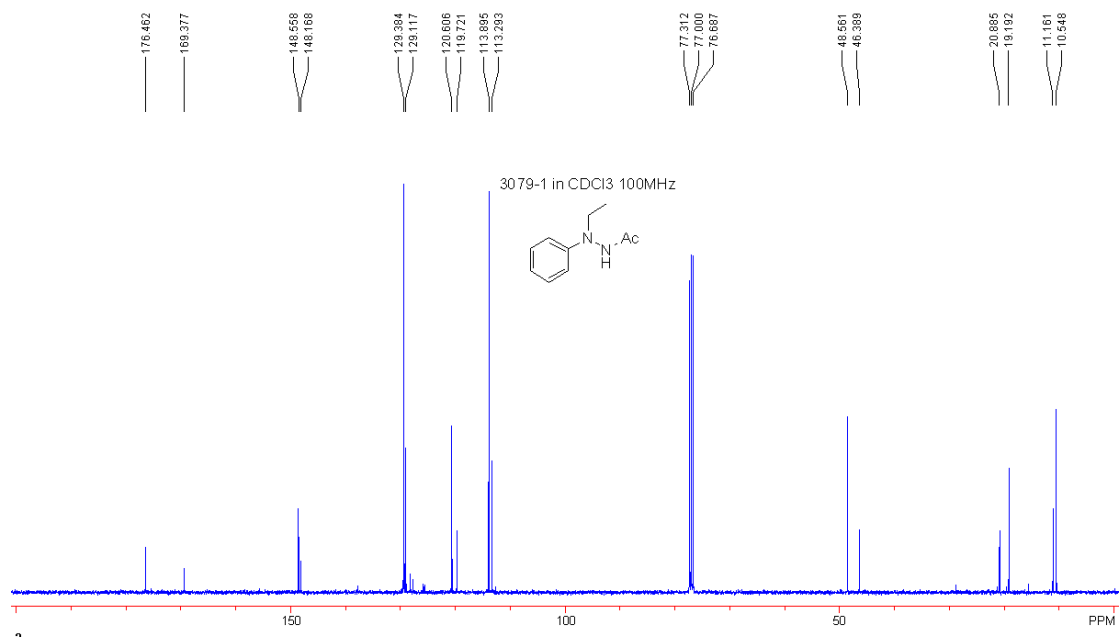

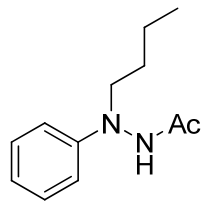

11

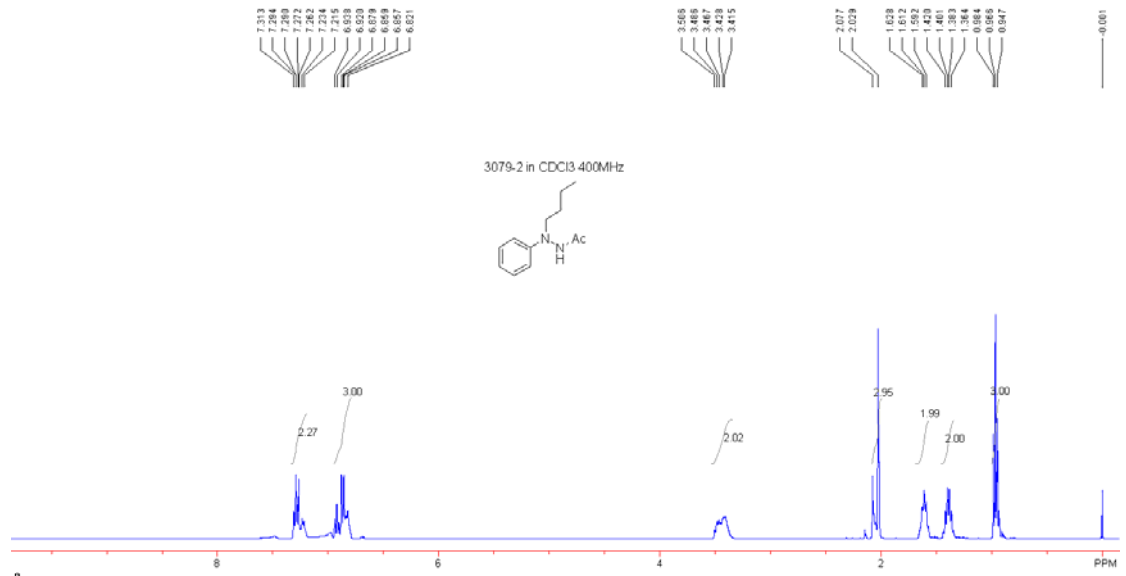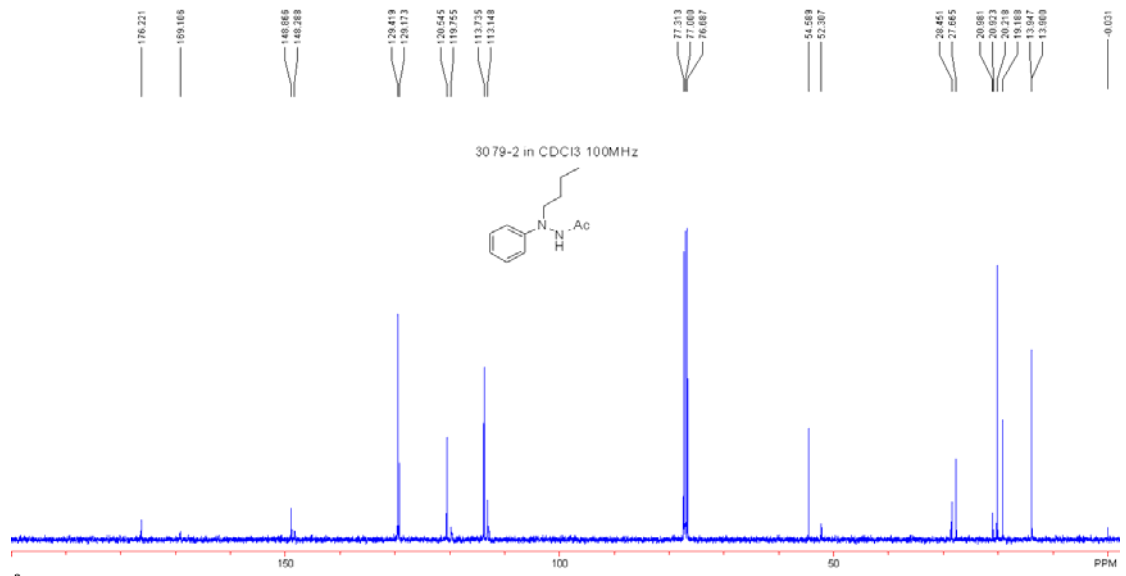

## 2. $^1\text{H}$ NMR and $^{13}\text{C}$ NMR spectra of the products

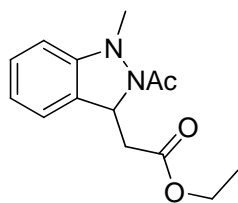

3aa

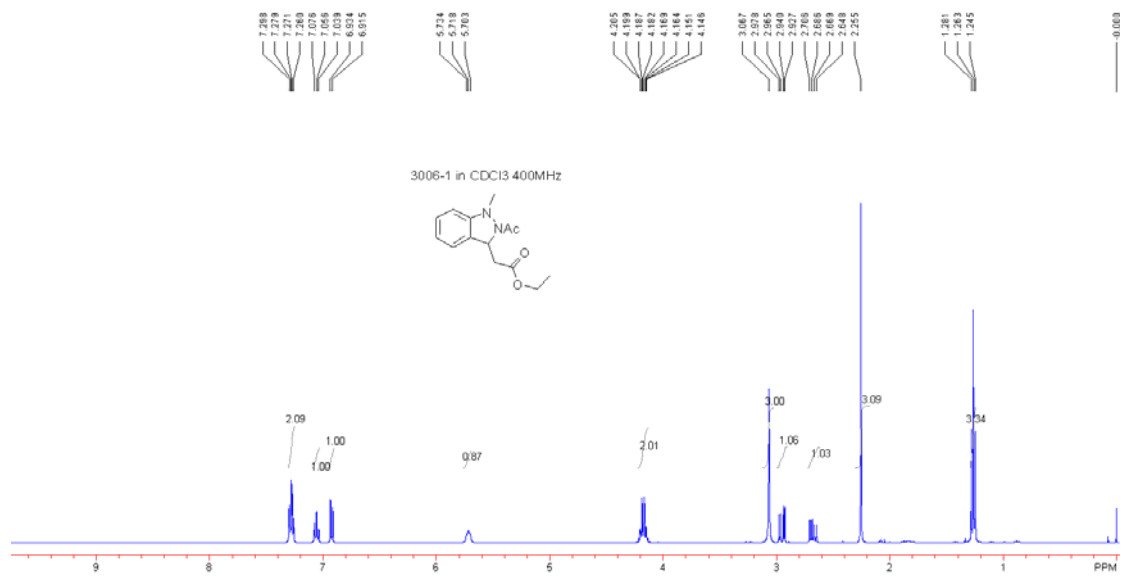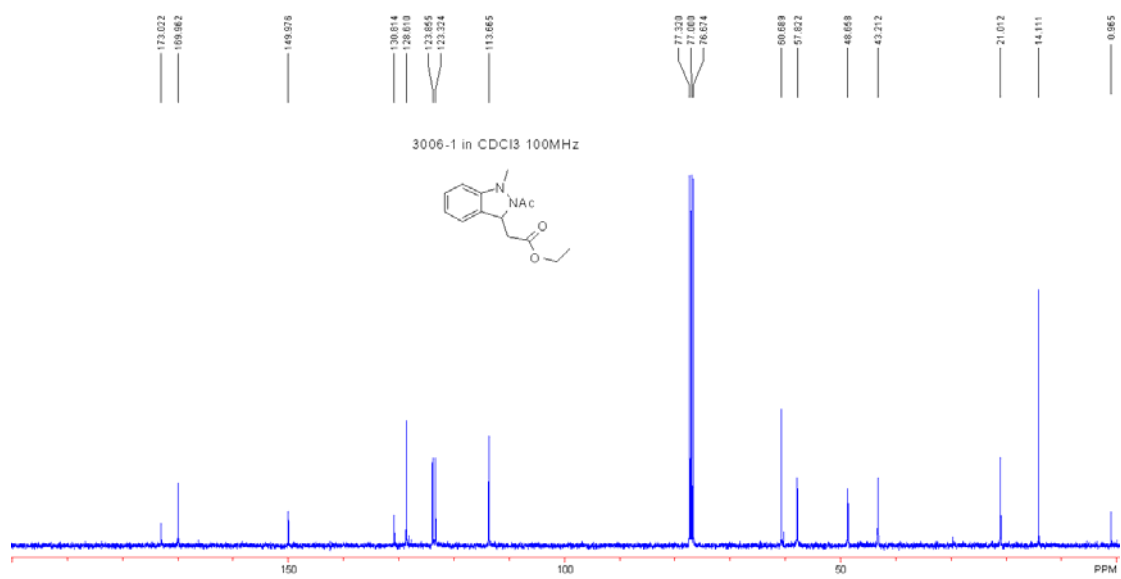

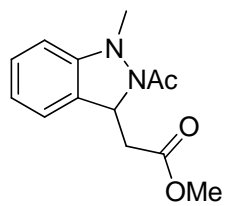

**3ab**

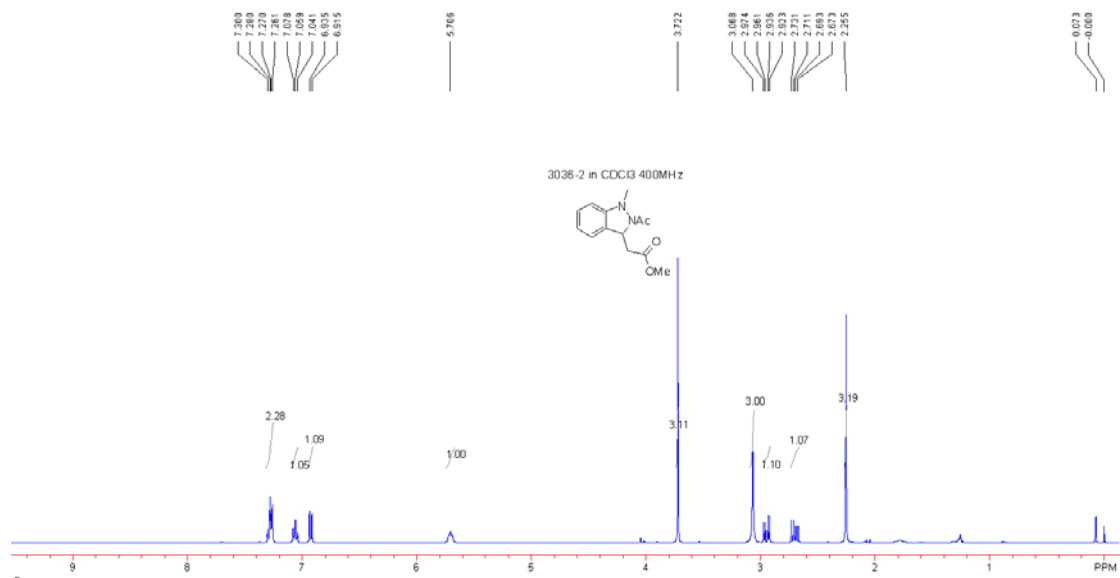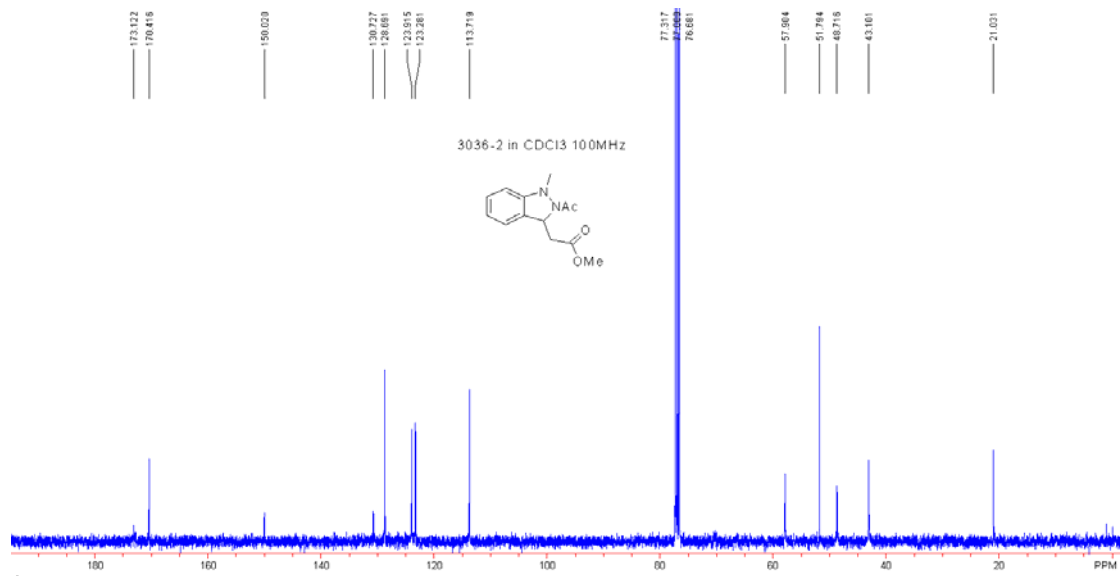

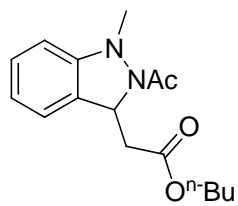

**3ac**

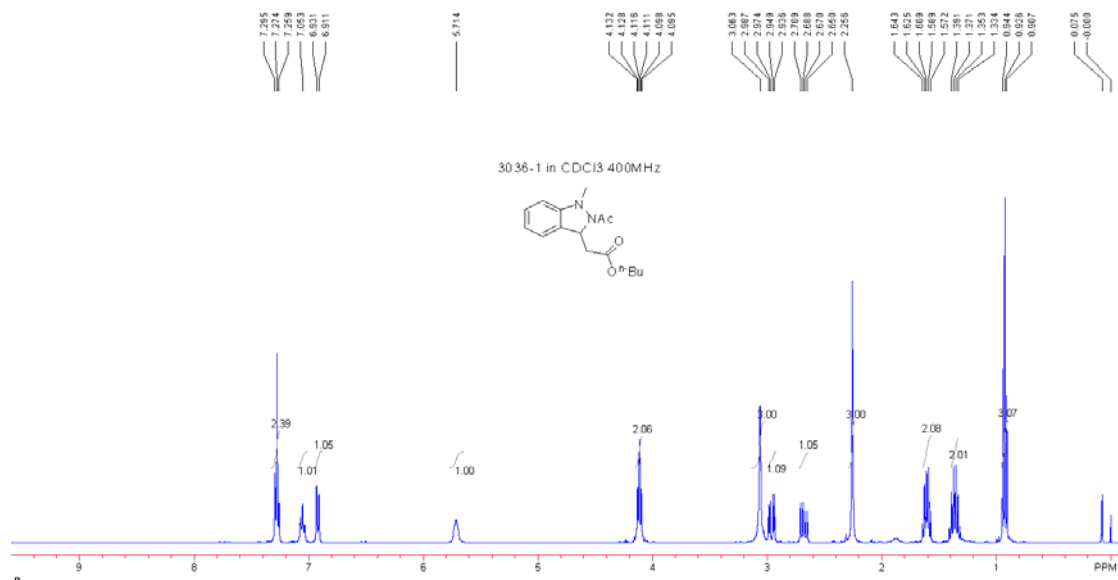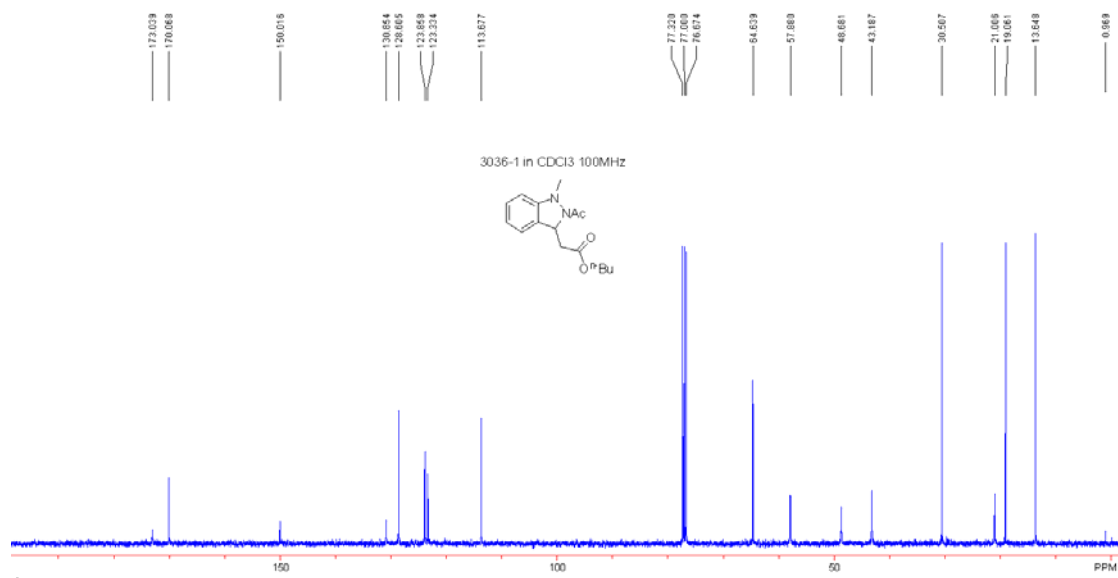



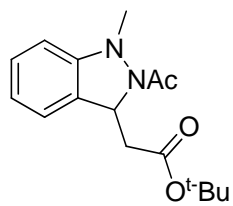

**3ad**

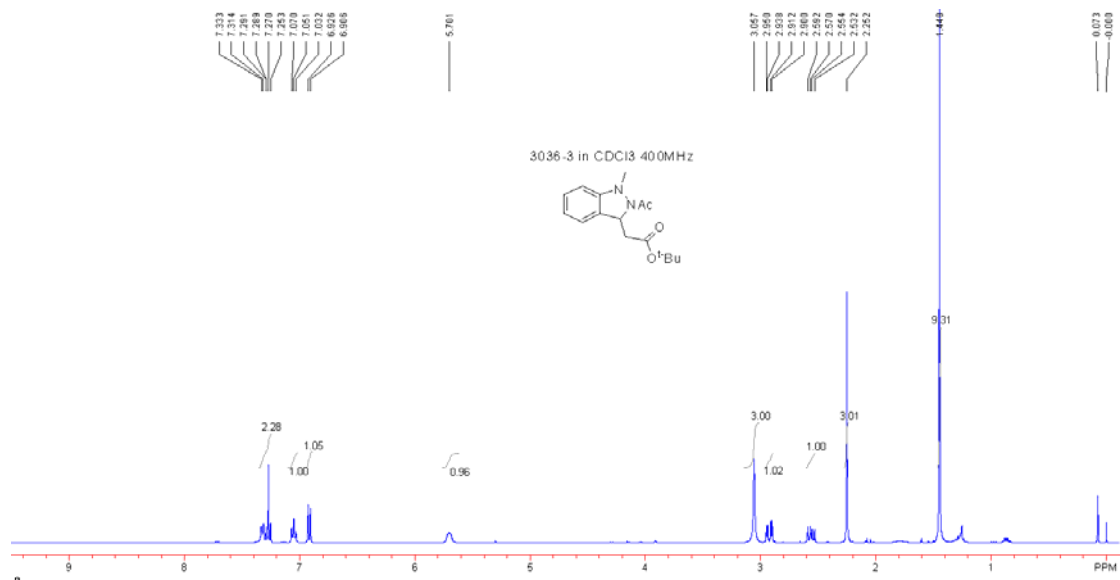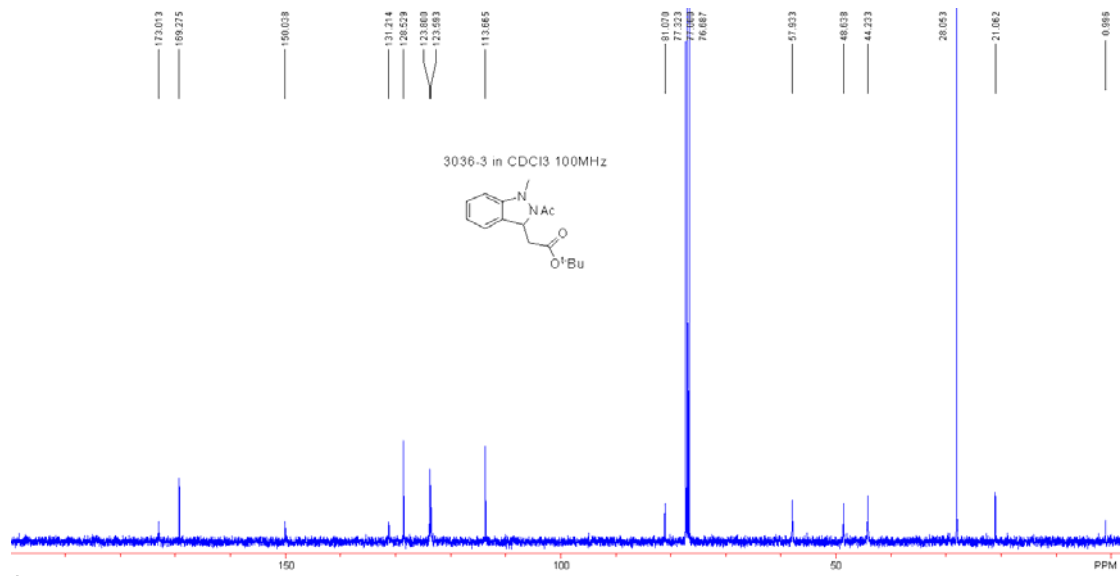

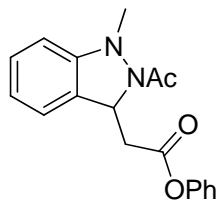

**3ae**

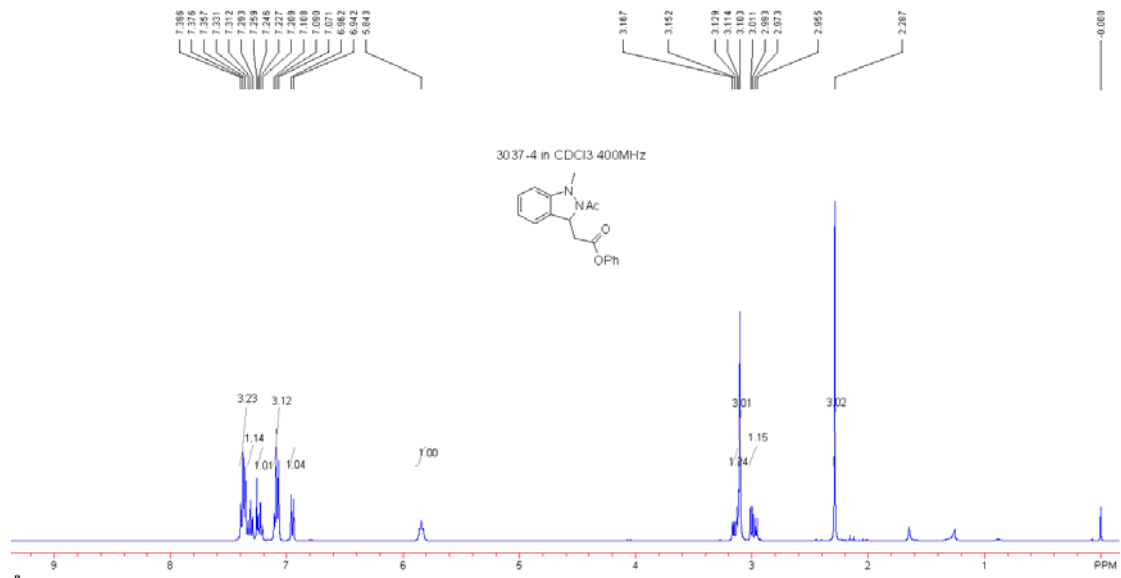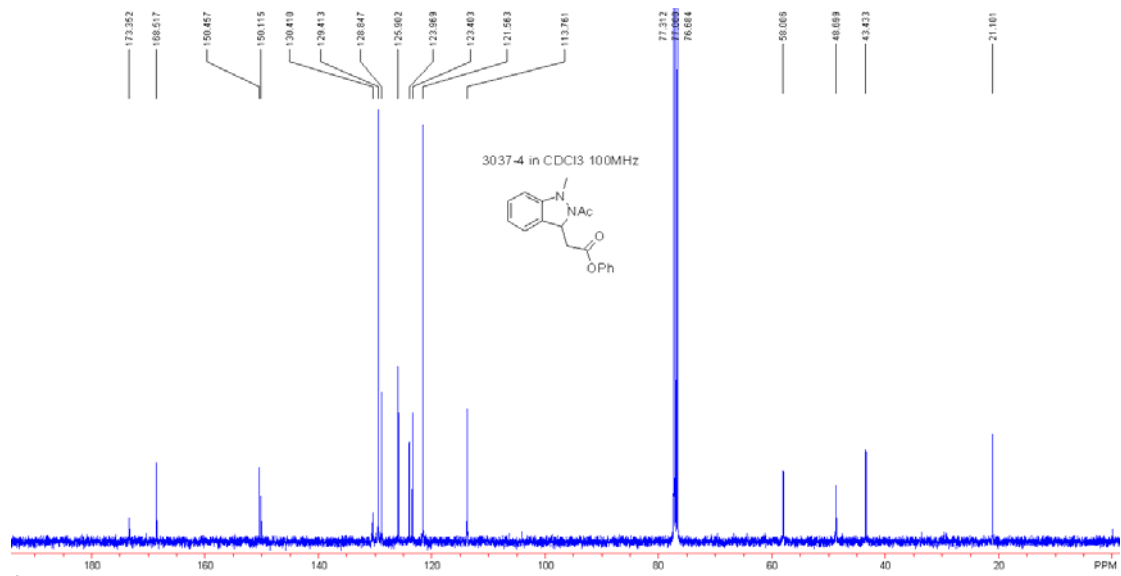

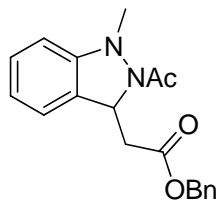

**3af**

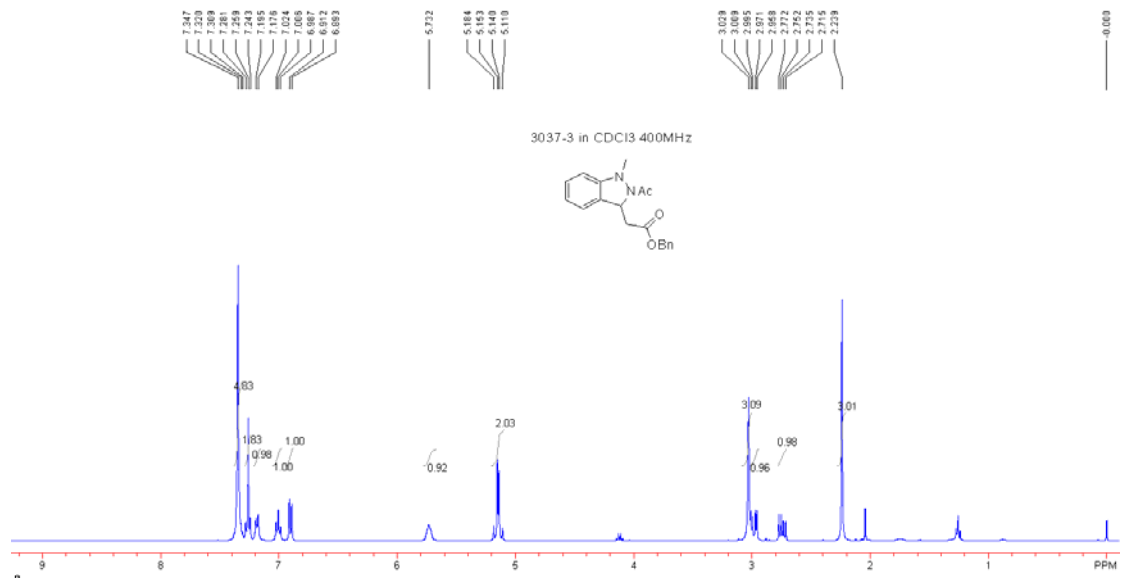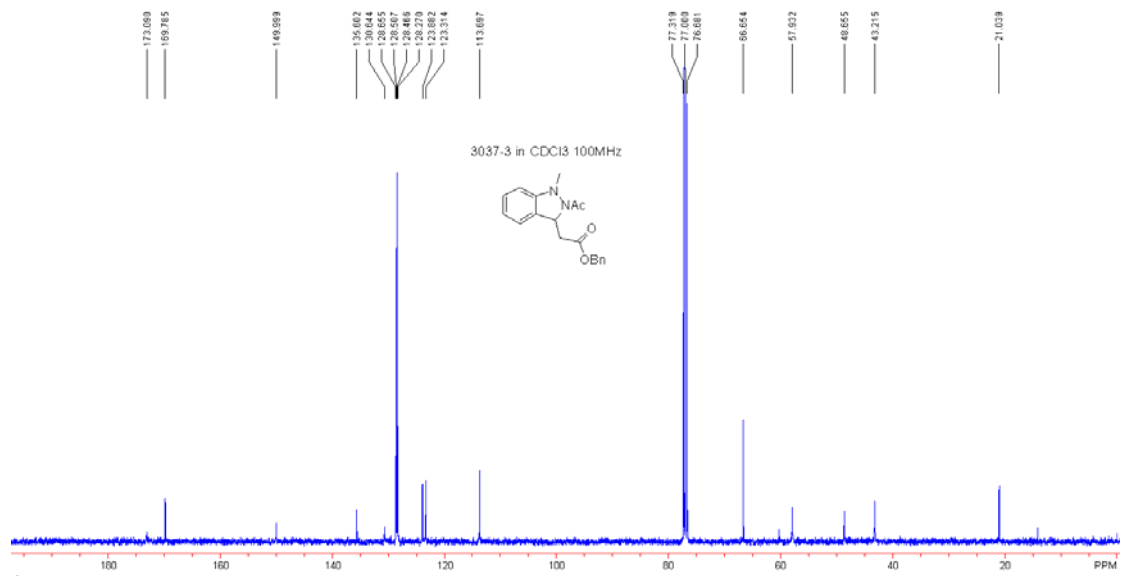

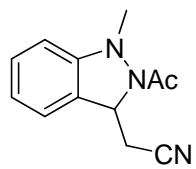

**3ag**

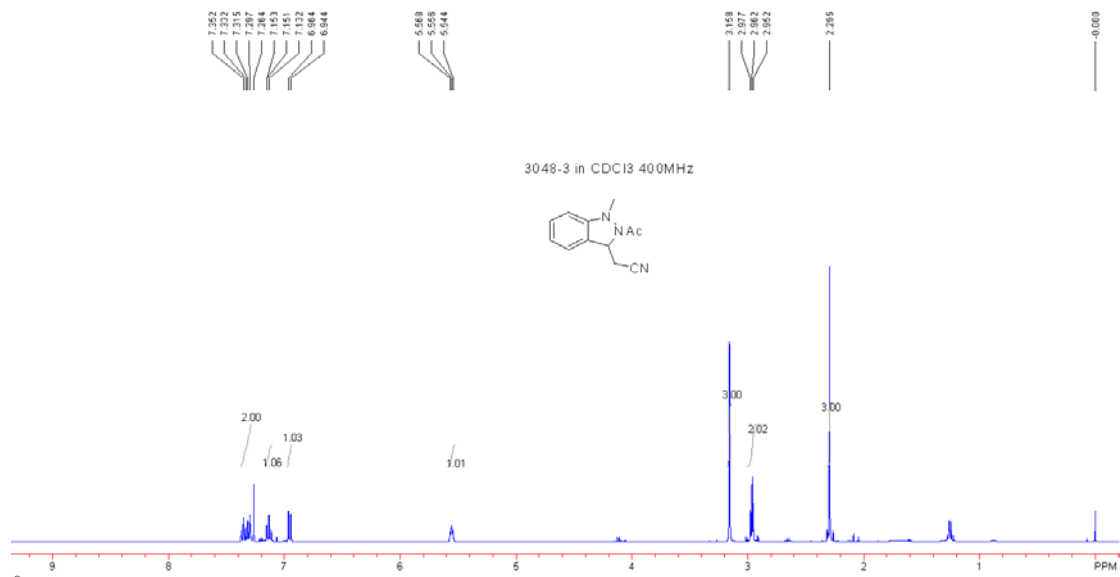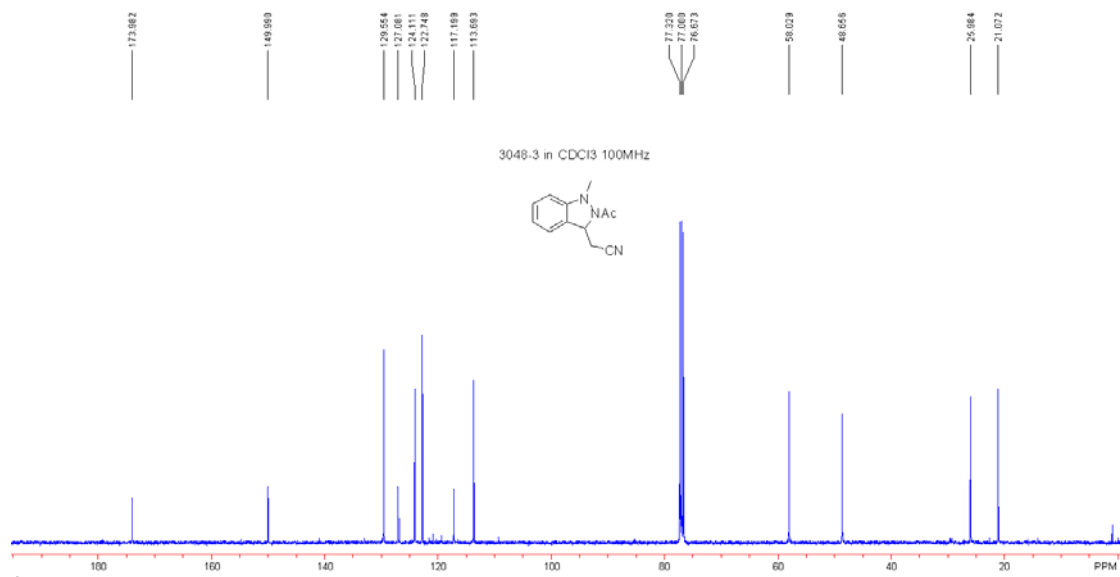

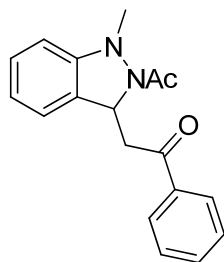

**3ah**

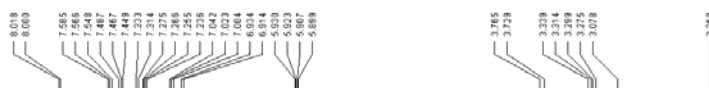

3053-1 in CDCl<sub>3</sub> 400MHz

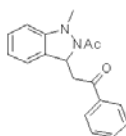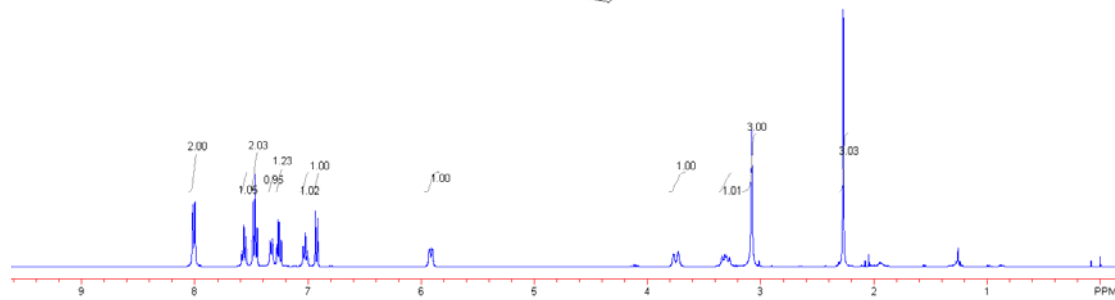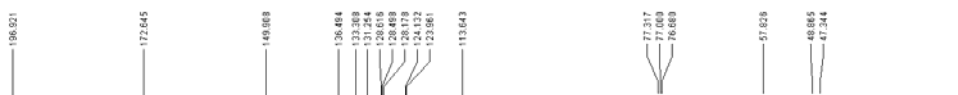

3053-1 in CDCl<sub>3</sub> 100MHz

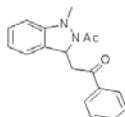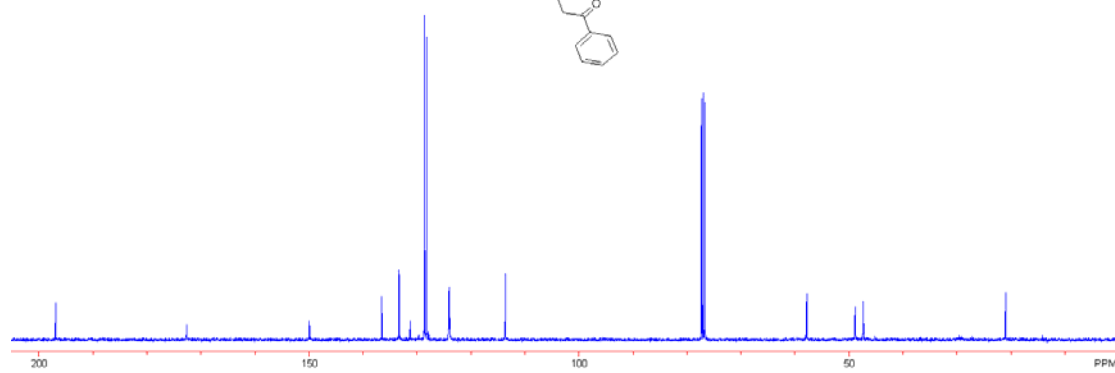

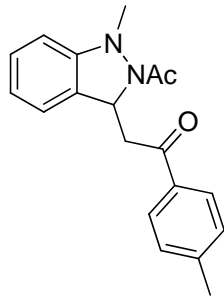

**3ai**

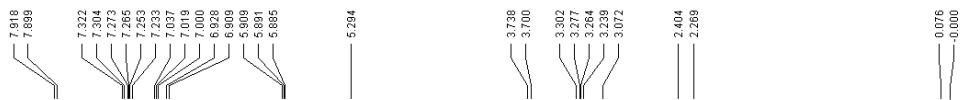

3062-1 in CDCl<sub>3</sub> 400MHz

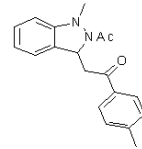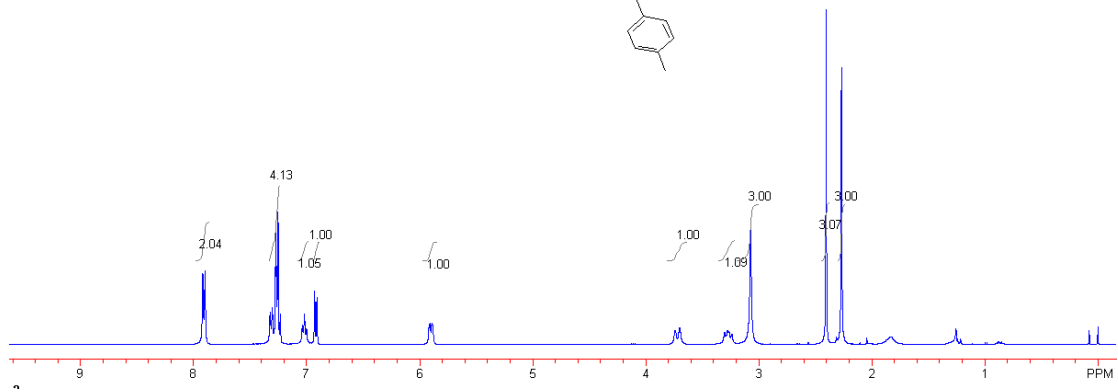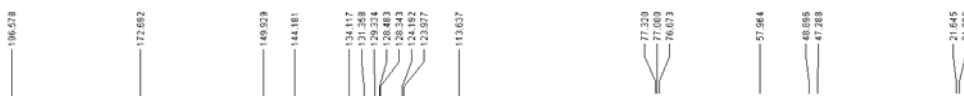

3062-1 in CDCl<sub>3</sub> 100MHz

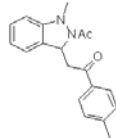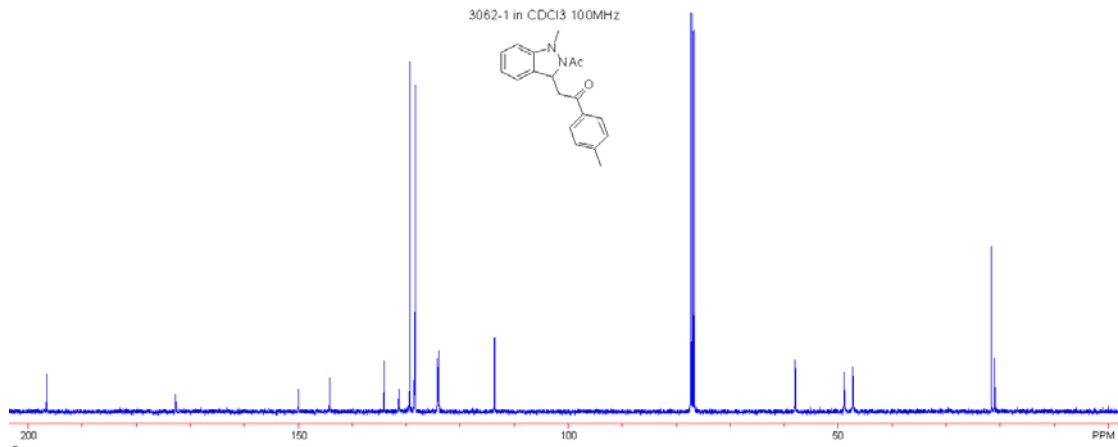

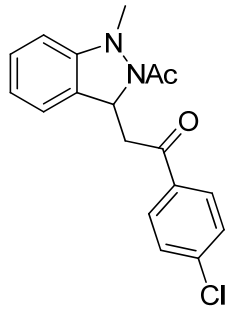

3aj

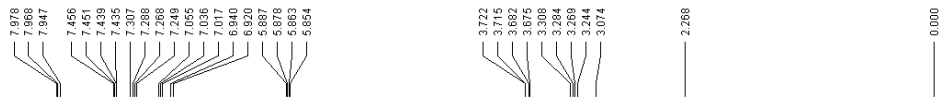

3062-2 in CDCl3 400MHz

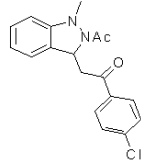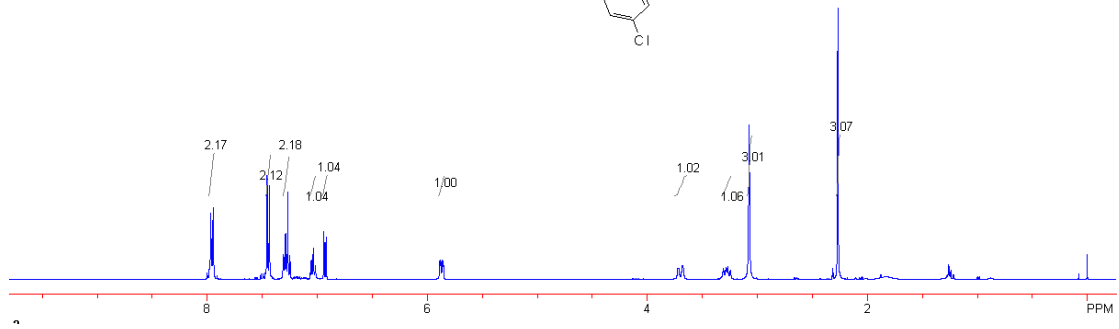

3062-2 in CDCl3 100MHz

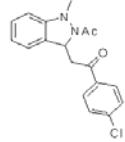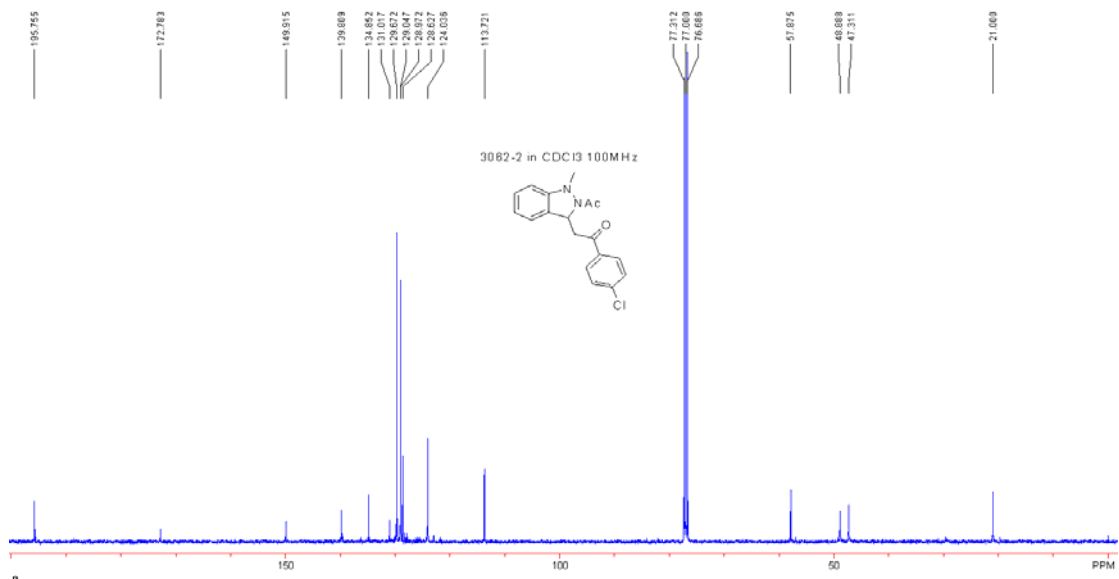

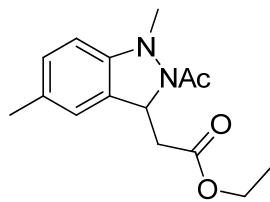

**3ba**

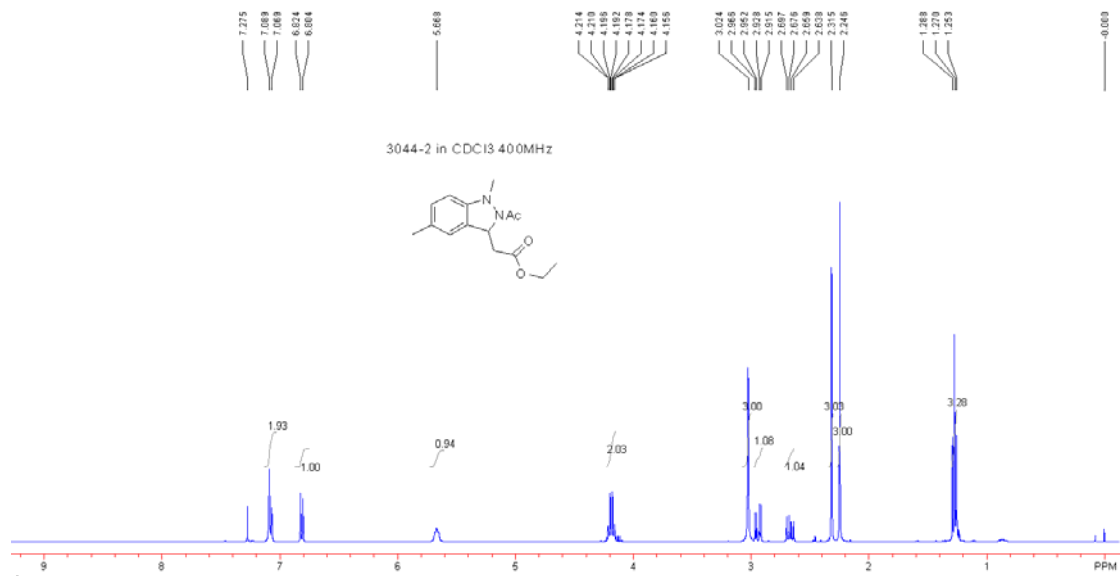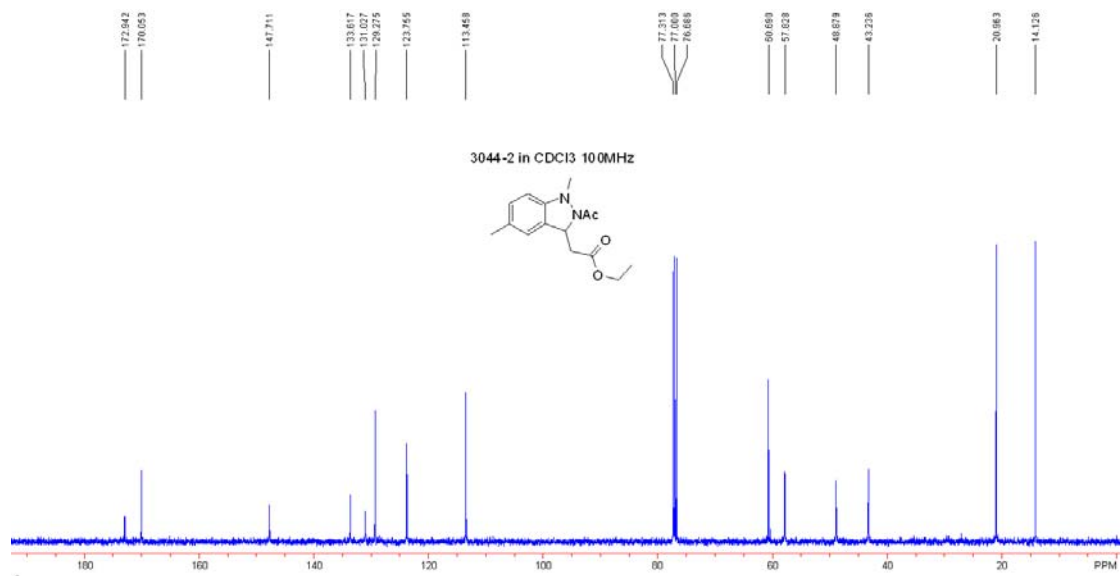



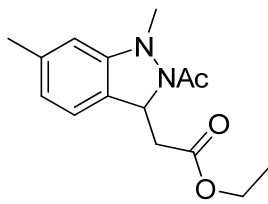

**3ca**

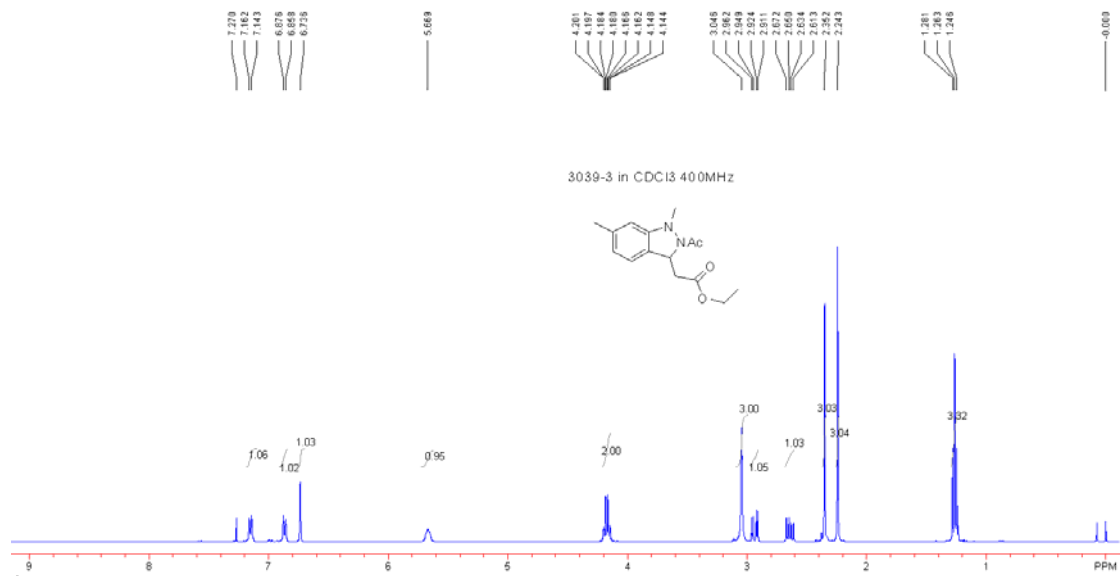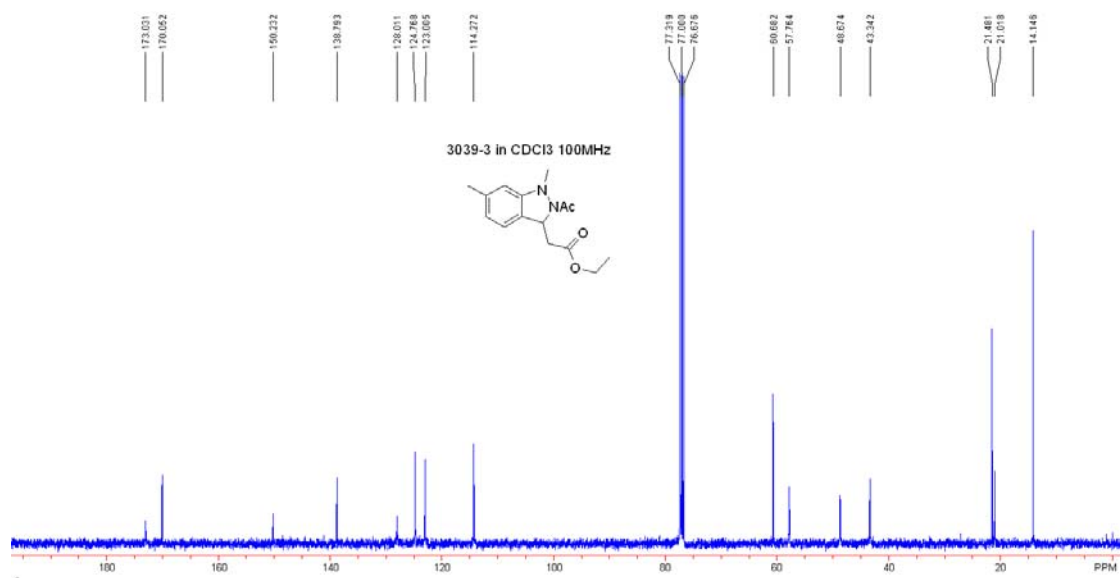

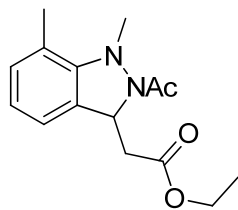

3da

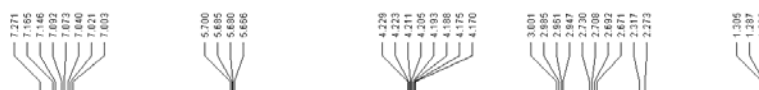

3061-1 in CDCl3 400MHz

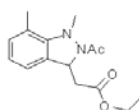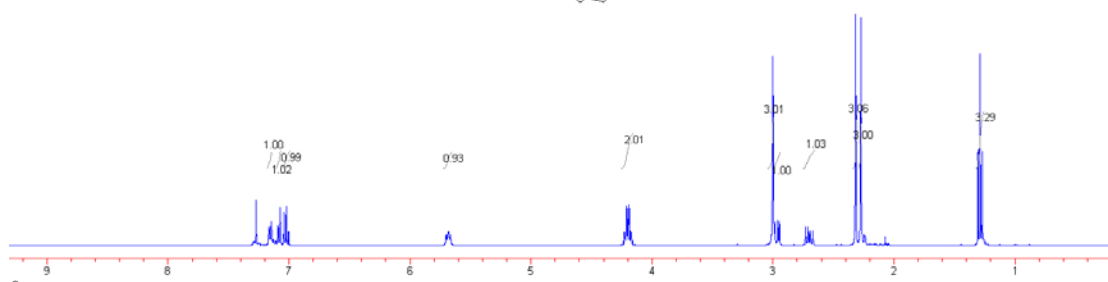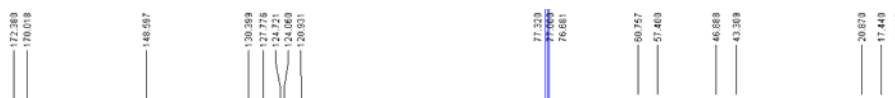

3061-1 in CDCl3 100MHz

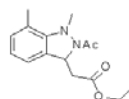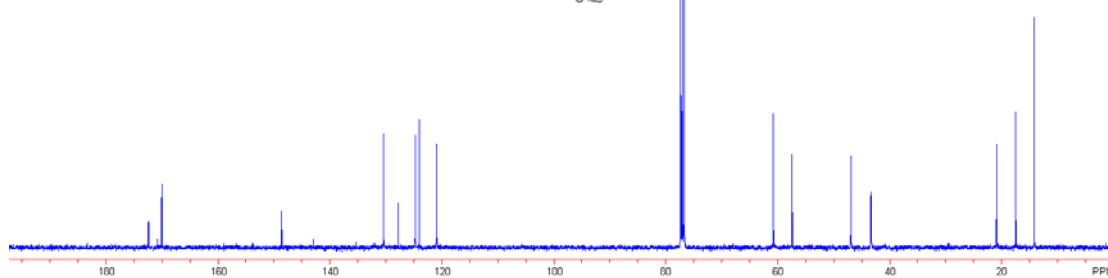

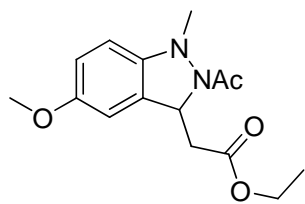

**3ea**

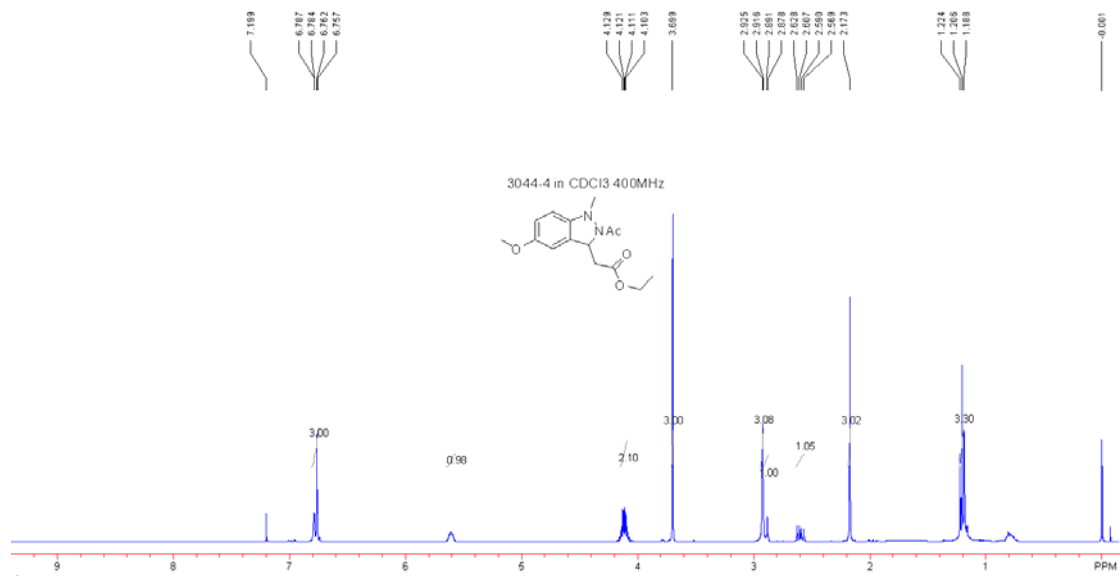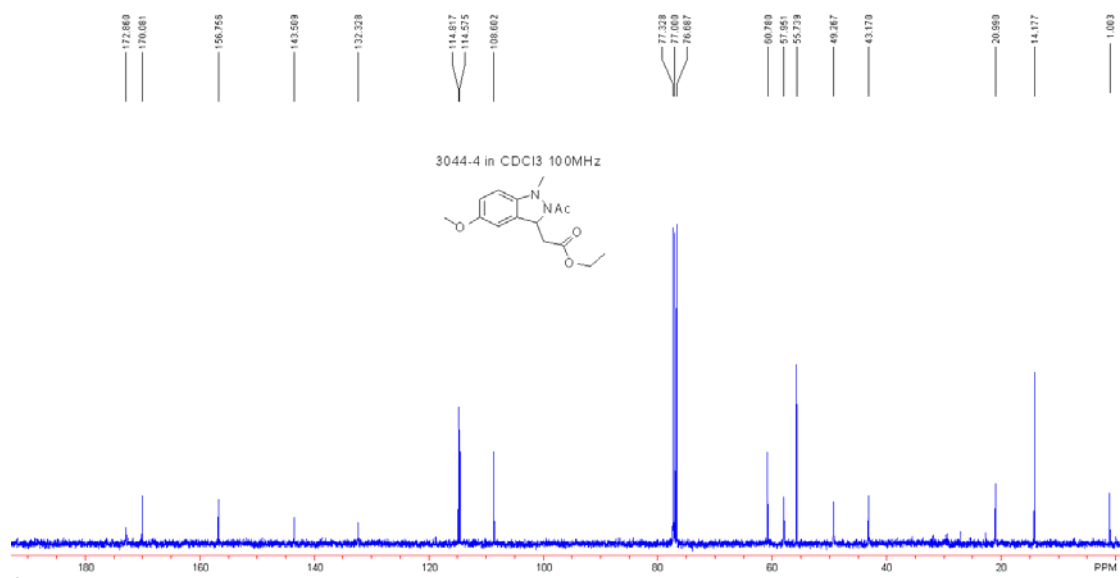

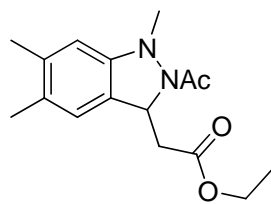

**3fa**

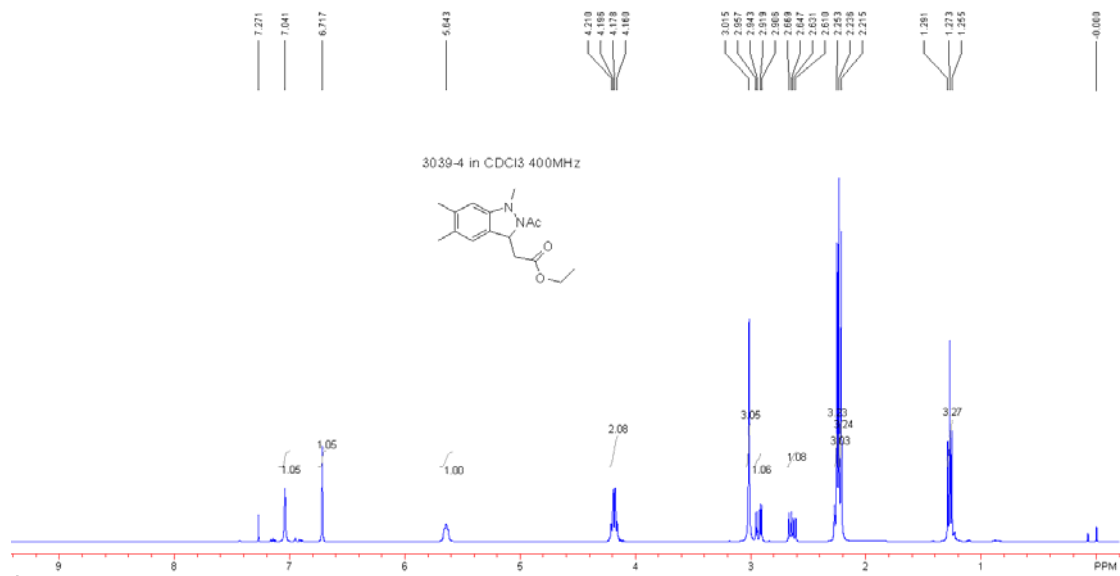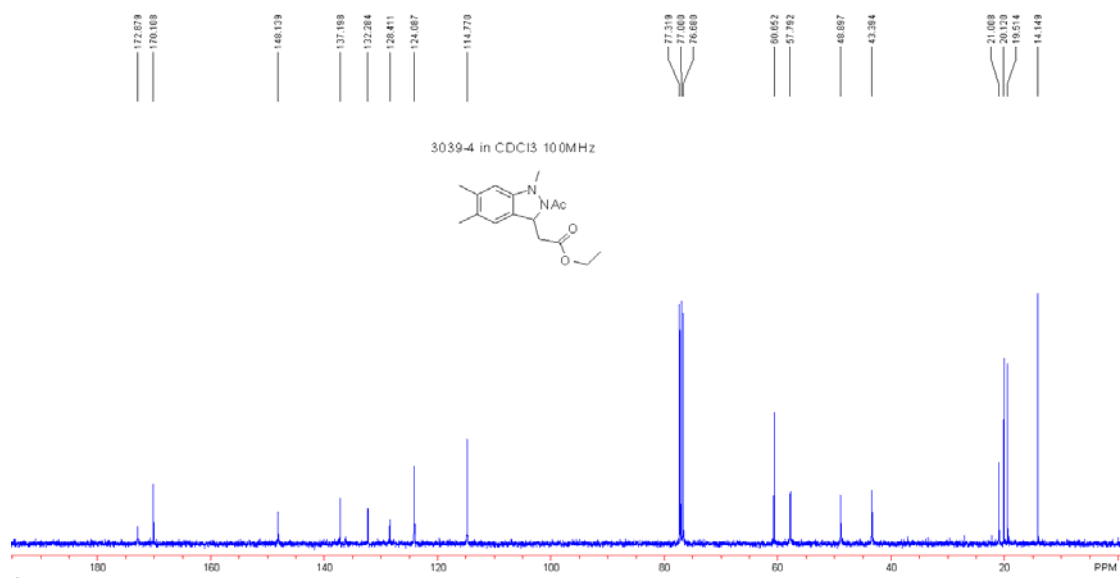

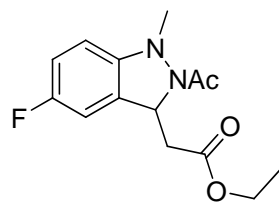

**3ga**

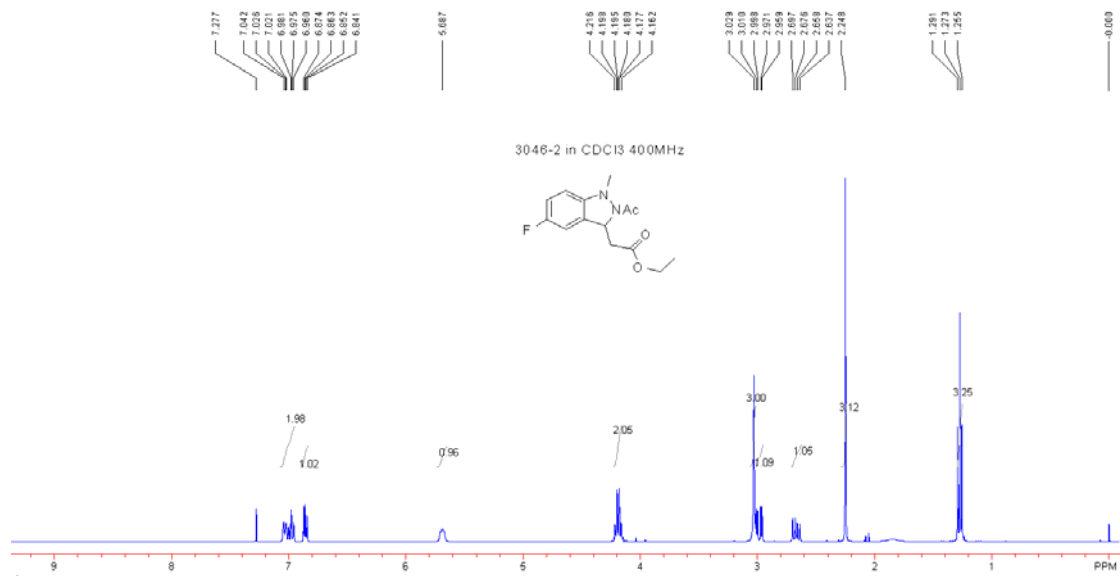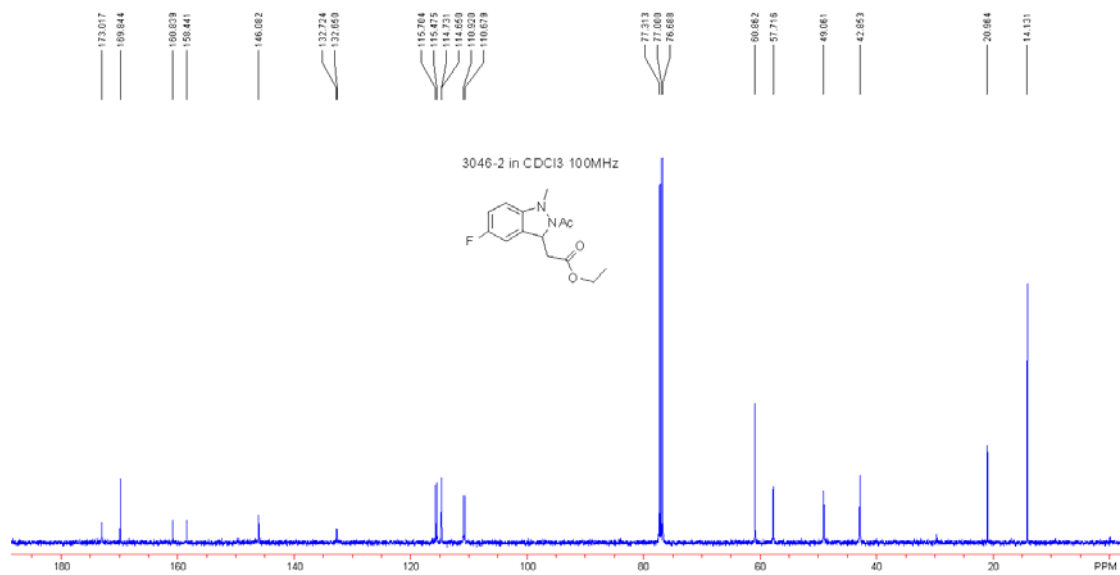

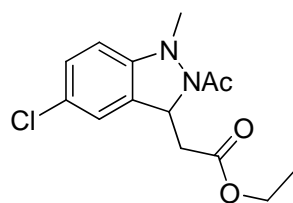

**3ha**

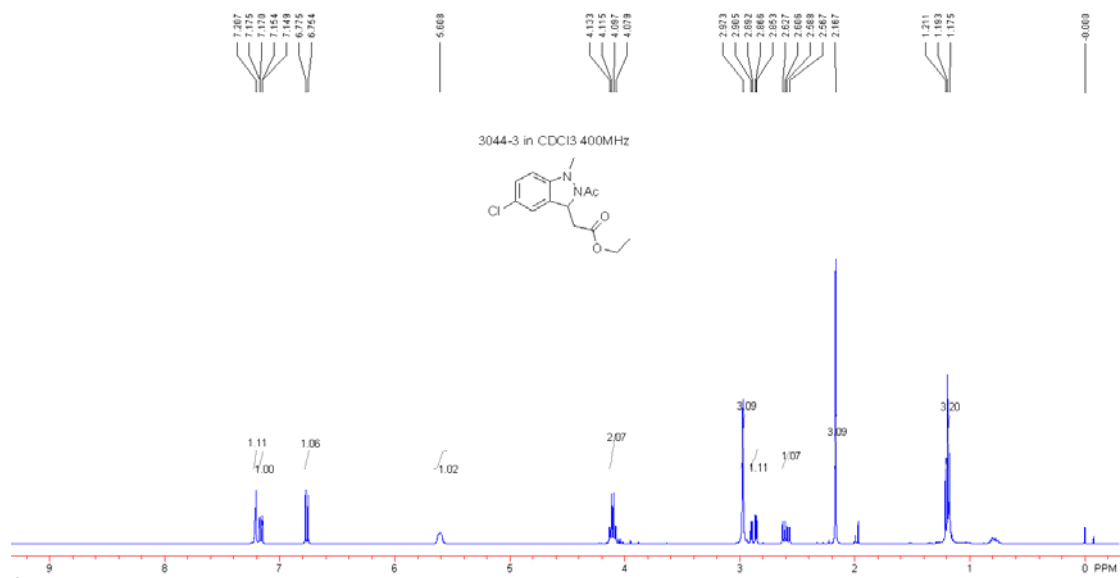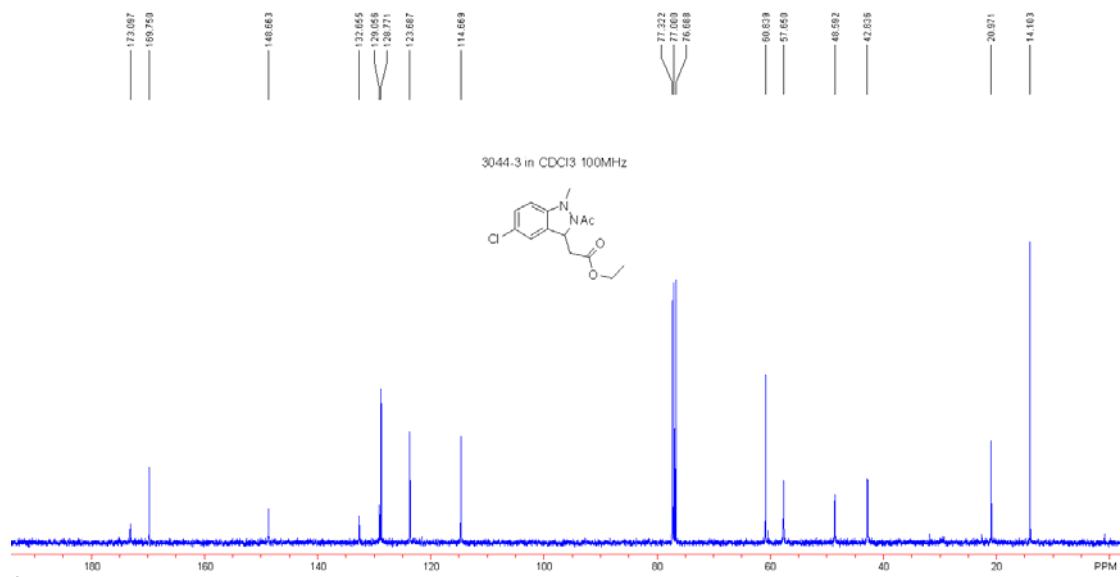

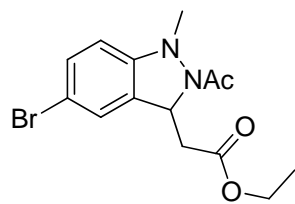

**3ia**

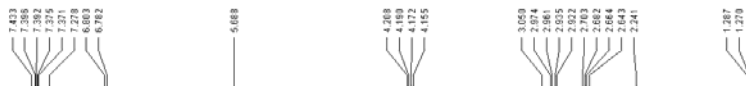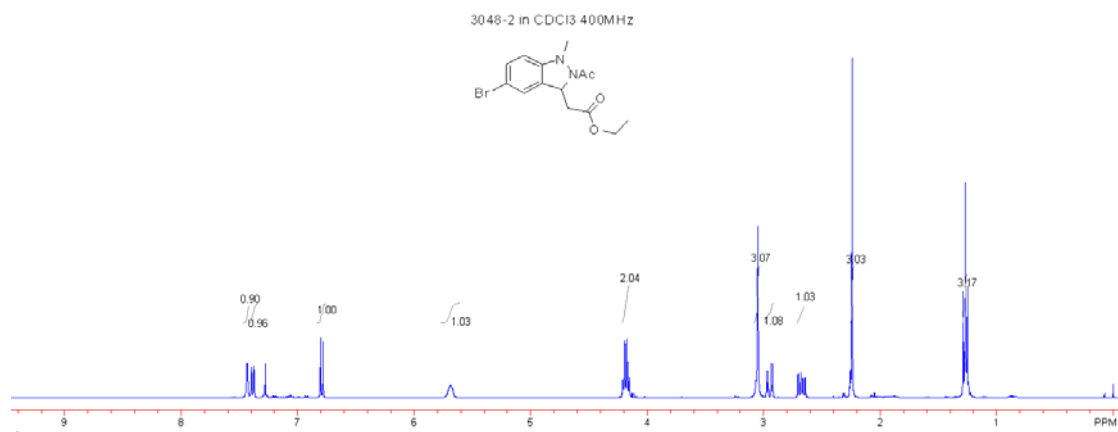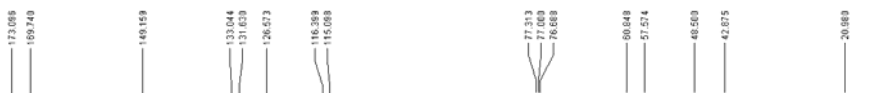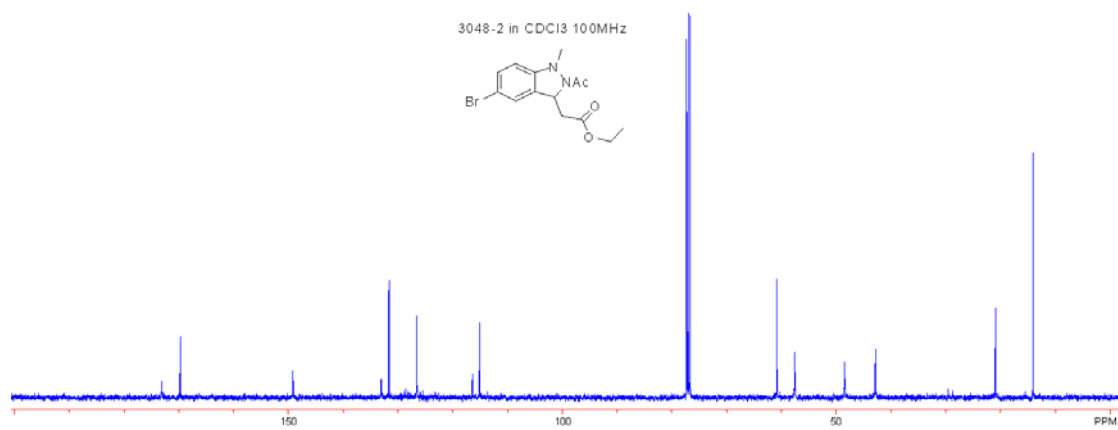

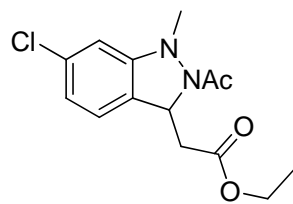

3ja

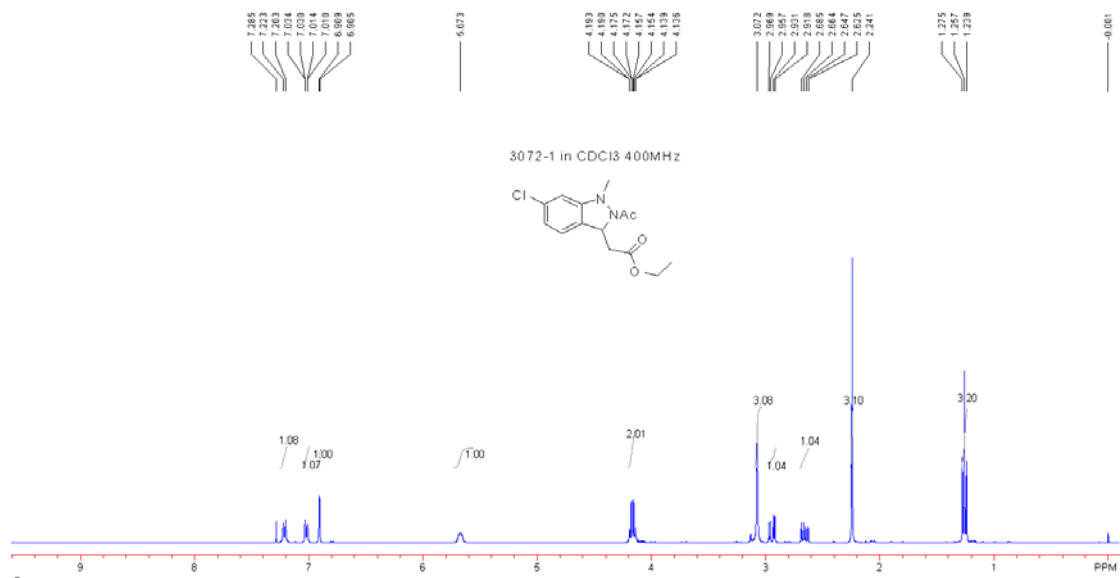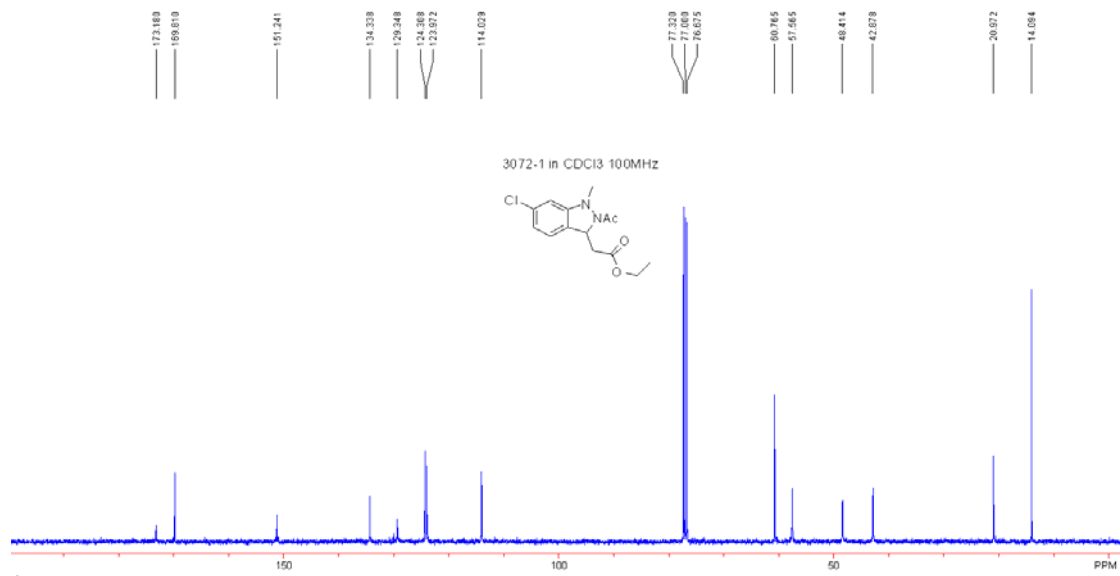



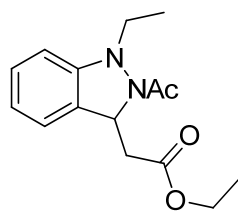

3ka

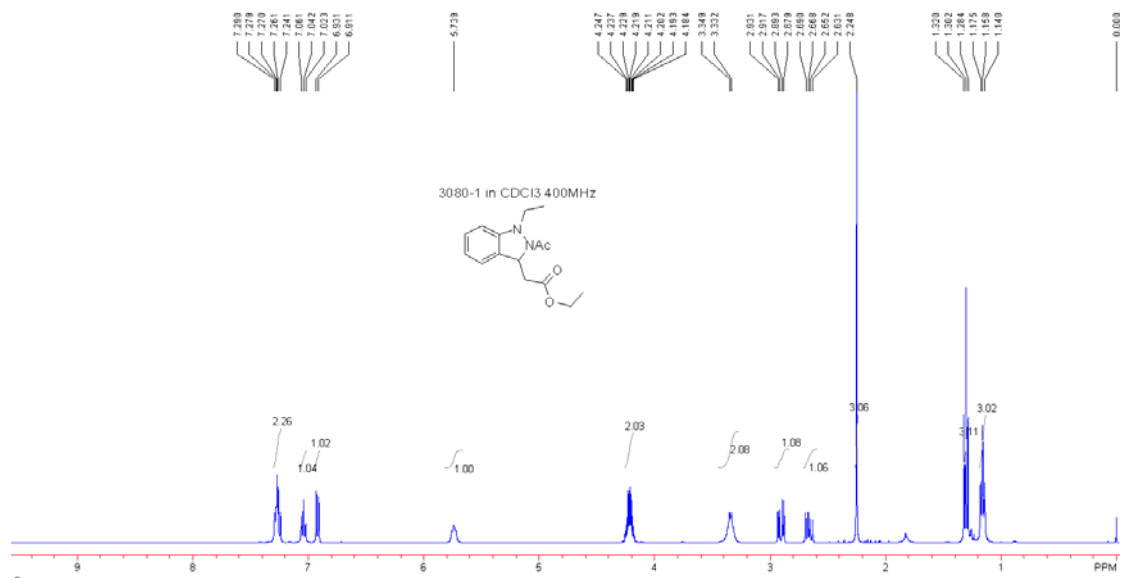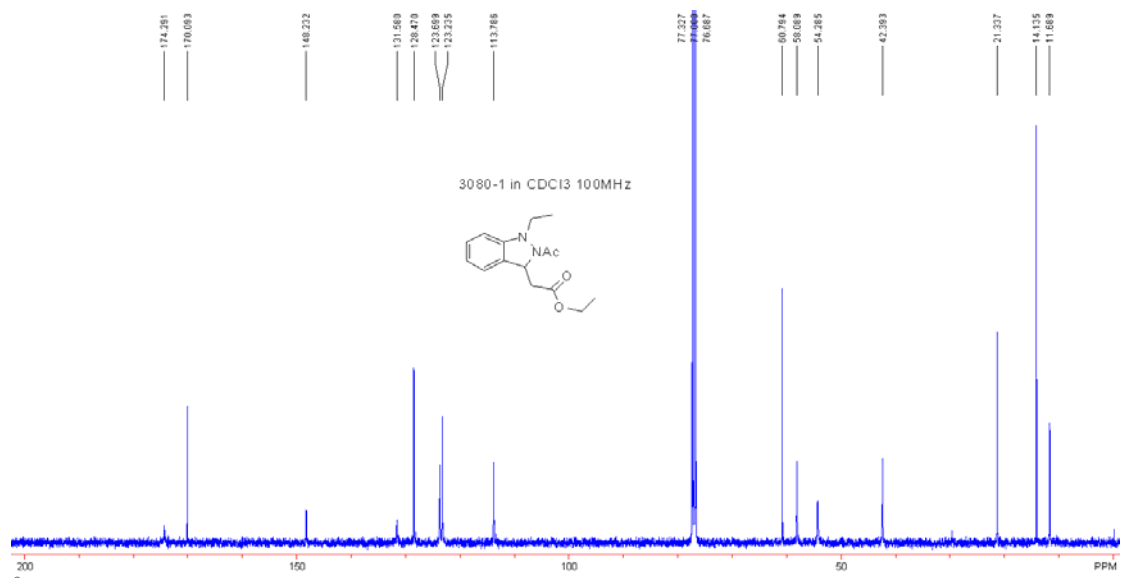



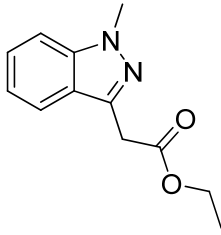

4a

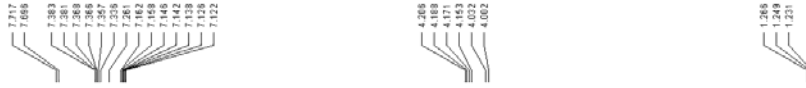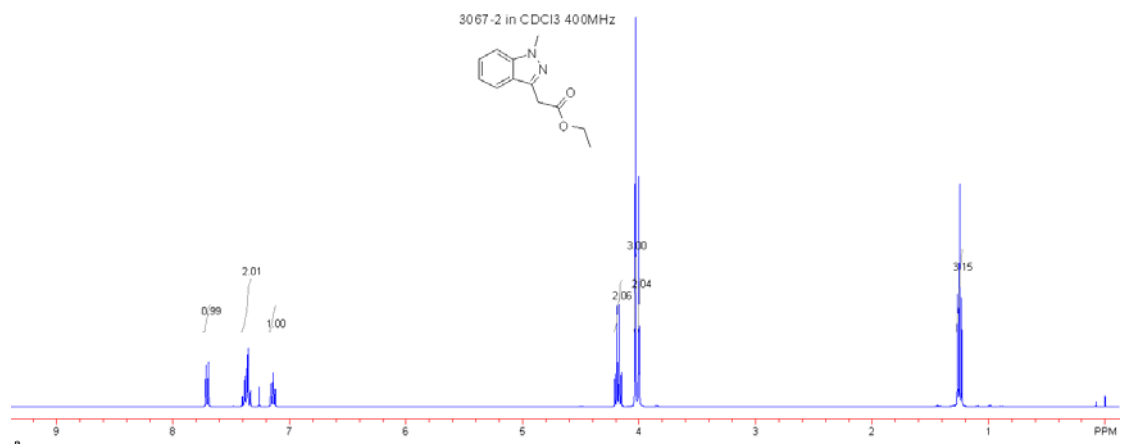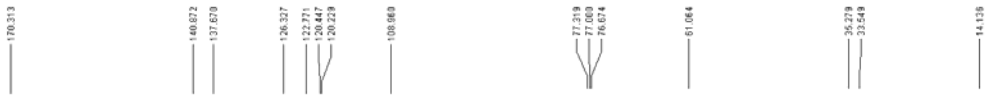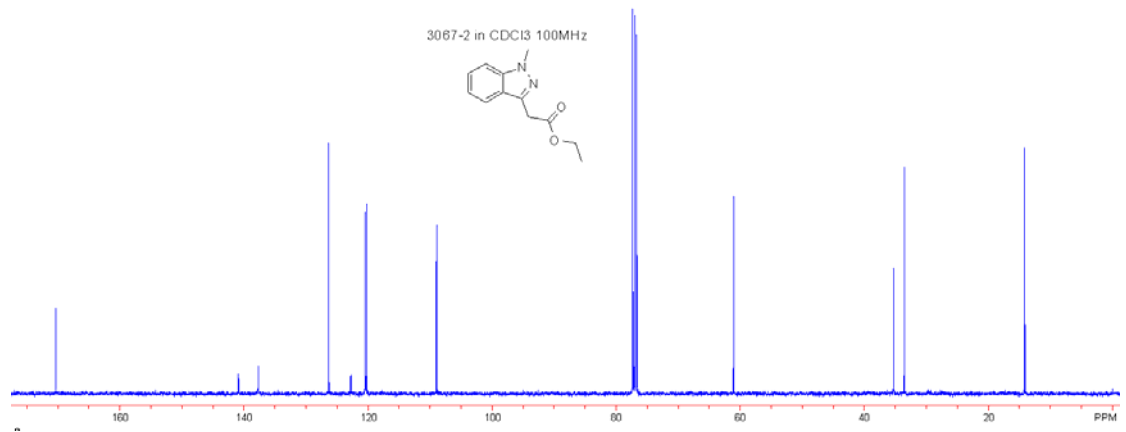

Supplement: c4ob00921e1.pdf [file c4ob00921e1.pdf]
